# Supplementary material for: RhIII-Catalyzed site-selective amidation with nitrone as a traceless directing group: an approach to functionalized arylaldehydes
Source: Royal Society of Chemistry journal article supplement (doi:10.1039/c7cc05297a), 2017-01-01

## *Supporting Information*

### **Rh<sup>III</sup>-catalyzed site-selective C–H amidation with nitronone as a traceless directing group: an approach to functionalized arylaldehydes**

Hong Deng,<sup>a</sup> Hongji Li,<sup>\*,a</sup> Wenge Zhang,<sup>a</sup> and Lei Wang<sup>\*,a,b</sup>

<sup>a</sup>Department of Chemistry, Huaibei Normal University, Huaibei, Anhui 235000, P.R. China, Tel: +86-561-3802-069 Fax: +86-561-3090-518

E-mail: hongjili@chun.edu.cn; leiwang@chun.edu.cn

<sup>b</sup>State Key Laboratory of Organometallic Chemistry, Shanghai Institute of Organic Chemistry, Chinese Academy of Sciences, Shanghai 200032, P.R. China

#### *Table of Contents for Supporting Information*

|                                                                         |    |
|-------------------------------------------------------------------------|----|
| 1. General considerations.....                                          | 1  |
| 2. Typical procedure for the reaction of <b>1a</b> with <b>2a</b> ..... | 1  |
| 3. Optimization of the solvent on the model reaction.....               | 2  |
| 4. Kinetic isotope effect experiments.....                              | 2  |
| 5. X-ray single crystal structure of <b>3e</b> .....                    | 4  |
| 6. Typical transformation of <b>3a</b> and <b>3b</b> .....              | 4  |
| 7. Characterization data for the products.....                          | 6  |
| 8. References.....                                                      | 18 |
| 9. <sup>1</sup> H and <sup>13</sup> C NMR spectra of the products.....  | 20 |

## 1. General considerations

All  $^1\text{H}$  NMR and  $^{13}\text{C}$  NMR spectra were recorded on a 400 MHz Bruker FT-NMR spectrometers (400 MHz and 100 MHz, respectively). All chemical shifts are given as  $\delta$  value (ppm) with reference to tetramethylsilane (TMS) as an internal standard. The peak patterns are indicated as follows: s, singlet; d, doublet; t, triplet; m, multiplet; q, quartet. The coupling constants,  $J$ , are reported in Hertz (Hz). High resolution mass spectroscopy data of the products were collected on an Agilent Technologies 6540 UHD Accurate-Mass Q-TOF LC/MS (ESI).

Arylnitrones were prepared according to reported methods,<sup>1</sup> and they must be recrystallized from ethanol/petroleum ether before use. Dioxazolones were prepared according to reported methods.<sup>2</sup> All chemicals were purchased from commercial suppliers, Aldrich of USA, or Shanghai Chemical Company of China. All the solvents were dried and freshly distilled in  $\text{N}_2$  prior to use. Products were purified by flash chromatography on 200–300 mesh silica gels,  $\text{SiO}_2$ .

## 2. Typical procedure for the reaction of **1a** with **2a**

A 10 mL Schlenk tube was charged with (*Z*)-*N*-benzylideneaniline oxide (**1a**, 39.4 mg, 0.20 mmol), 3-phenyl-1,4,2-dioxazol-5-one (**2a**, 40.8 mg, 0.25 mmol),  $[\text{Cp}^*\text{RhCl}_2]_2$  (3.7 mg, 3 mol %),  $\text{AgSbF}_6$  (6.9 mg, 0.02 mmol),  $\text{NaOAc}$  (4.9 mg, 0.06 mmol),  $\text{HOAc}$  (12.0 mg, 0.20 mmol). Then freshly distilled 1,2-dichloroethane (DCE, 1.0 mL) was injected into the Schlenk tube under air atmosphere. The reaction tube was placed in an oil bath. After the reaction was carried out at 100 °C for 20 h, the sealed tube was cooled to room temperature, detected by TLC, and extracted with dichloromethane (DCM, 3×5.0 mL). The organic layers were combined, dried over  $\text{MgSO}_4$ , and concentrated under reduced pressure to yield the crude product, which was purified by flash chromatography (silica gel, petroleum ether/ethyl acetate = 10:1 to 20:1), affording the desired product **3a** as a white solid (36.0 mg, 80% yield).

### 3. Optimization of the solvent on the model reaction

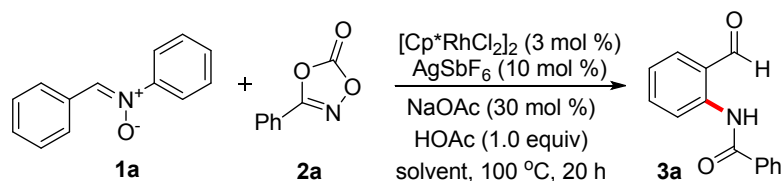

| entry | solvent            | yield (%) <sup>b</sup> |
|-------|--------------------|------------------------|
| 1     | DCE                | 80                     |
| 2     | MeOH               | n.r.                   |
| 3     | CH <sub>3</sub> CN | 7                      |
| 4     | THF                | 10                     |
| 5     | dioxane            | trace                  |
| 6     | toluene            | 43                     |
| 7     | CHCl <sub>3</sub>  | 65                     |

<sup>a</sup>Reaction conditions: (*Z*)-*N*-benzylideneaniline oxide (**1a**, 0.20 mmol), 3-phenyl-1,4,2-dioxazol-5-one (**2a**, 0.25 mmol), [Cp\*RhCl<sub>2</sub>]<sub>2</sub> (3 mol %), AgSbF<sub>6</sub> (10 mol %), NaOAc (30 mol %), HOAc (1.0 equiv), solvent (1.0 mL), 100 °C for 20 h. <sup>b</sup>Isolated yield.

### 4. Kinetic isotope effect (KIE) experiments

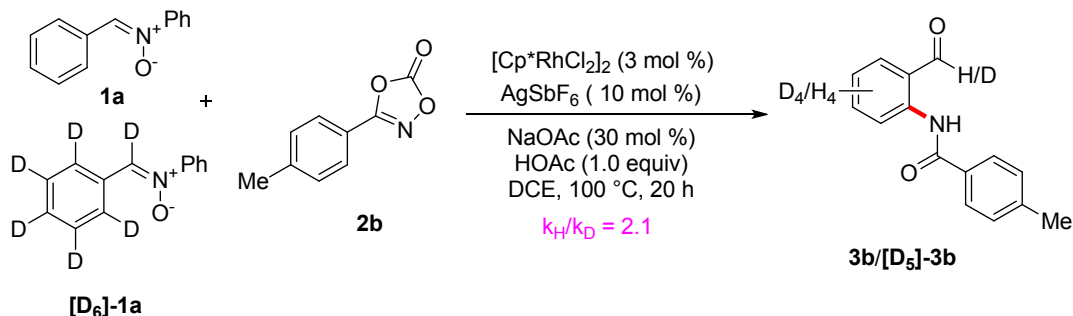

A 10 mL oven-dried reaction vessel equipped with a magnetic stirrer bar was charged with **1a** (0.10 mmol), [D<sub>6</sub>]-**1a** (0.10 mmol), 3-(*p*-tolyl)-1,4,2-dioxazol-5-one (**2b**, 0.25 mmol), [Cp\*RhCl<sub>2</sub>]<sub>2</sub> (3.7 mg, 3 mol %), AgSbF<sub>6</sub> (6.9 mg, 10 mol %), NaOAc (4.9 mg, 0.06 mmol), HOAc (12.0 mg, 0.20 mmol), and DCE (1.0 mL). The reaction vessel was placed in an oil bath. After the reaction was carried out at 100 °C for 20 h, it was cooled to room temperature, which was purified by flash chromatography (silica gel, petroleum ether/ethyl acetate = 10:1 to 20:1) to give the desired product **3b**/[D<sub>5</sub>]-**3b**. The KIE value was determined by <sup>1</sup>H NMR of **3b** and [D<sub>5</sub>]-**3b**.

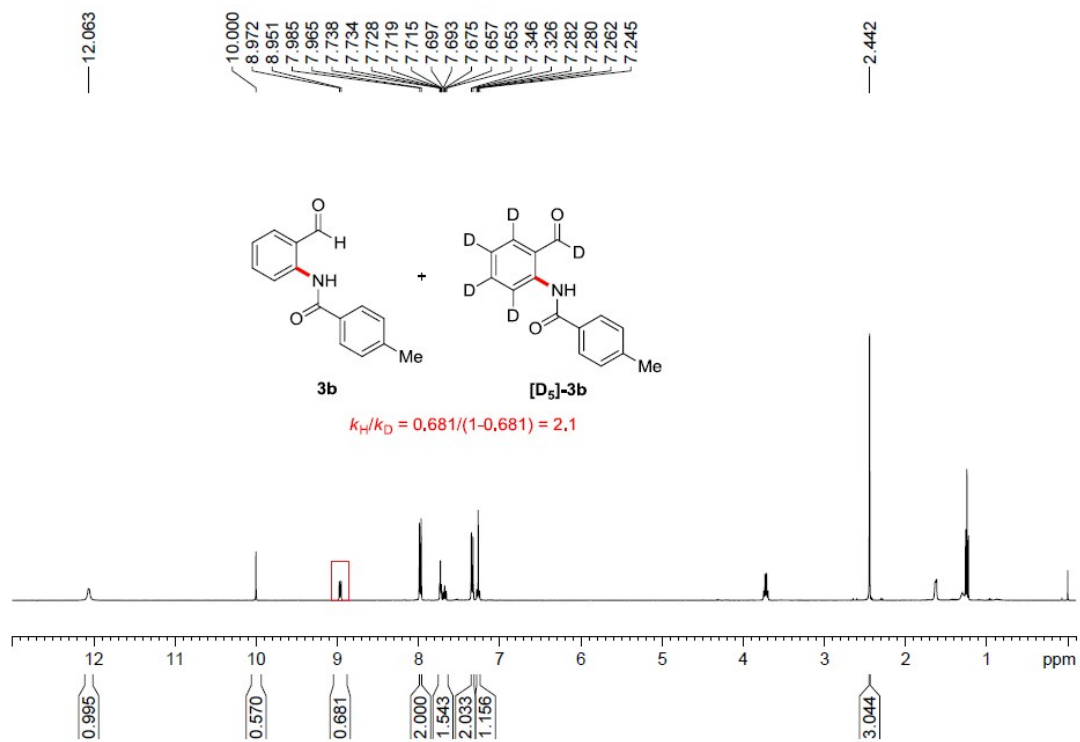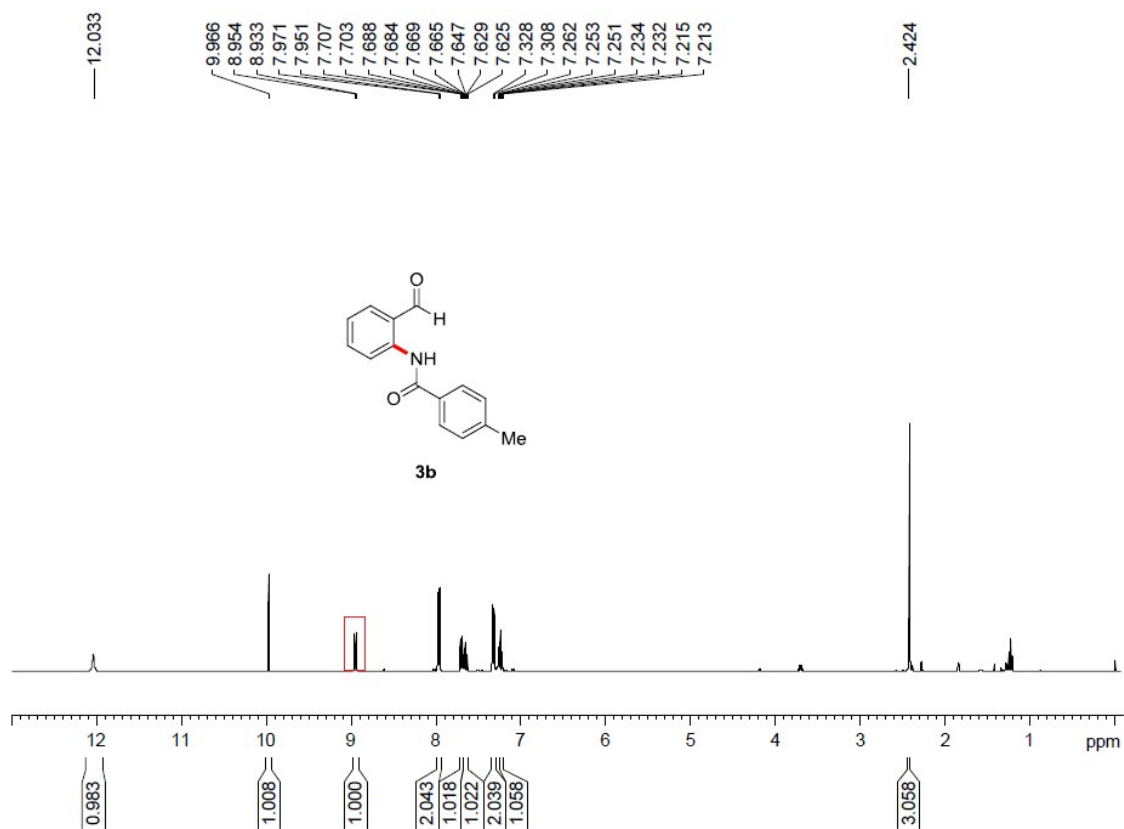

Scheme S1 Kinetic Isotope Effect (KIE) Experiments

## 5. X-ray single crystal structure of 3e (CCDC Number: 1553921)

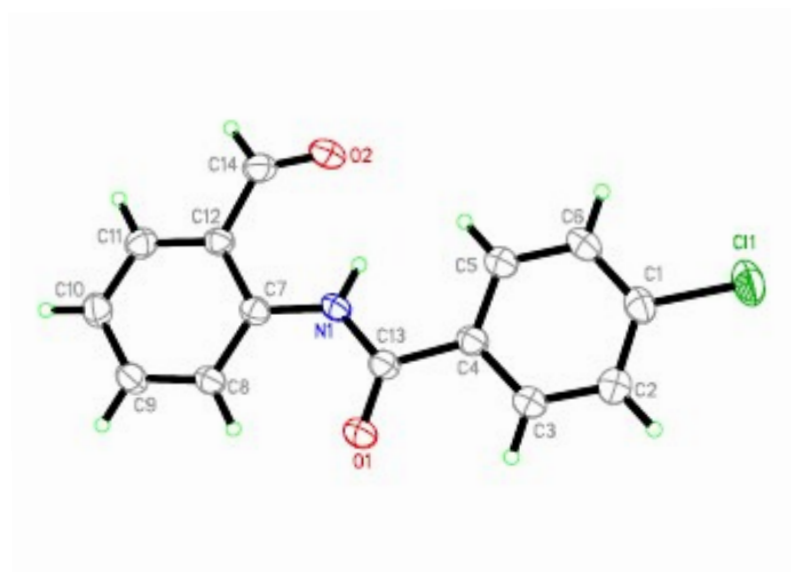

## 6. Design for the transformation of 3a/3b

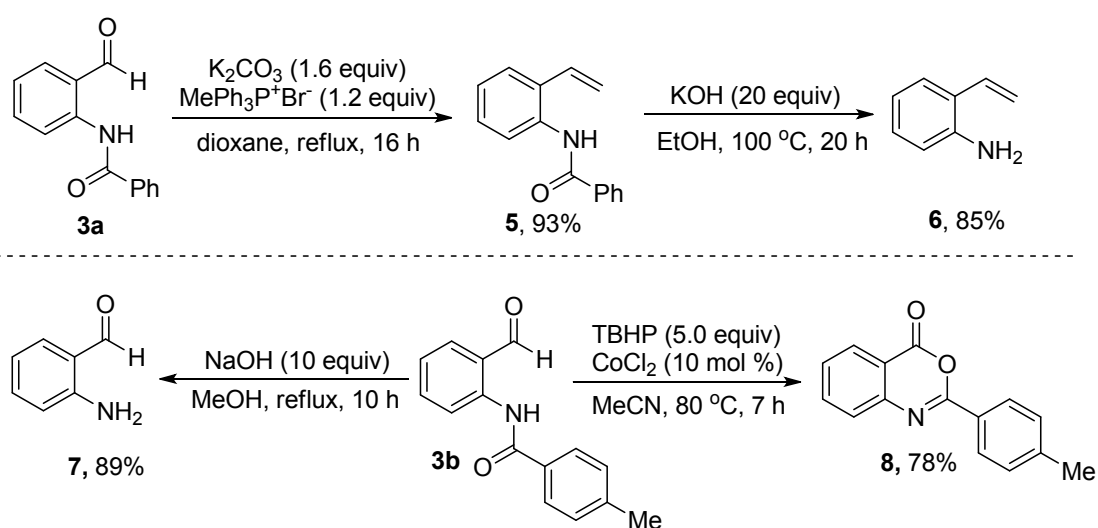

(1) A 10 mL Schlenk tube was charged with **3a** (45.0 mg, 0.2 mmol),  $\text{K}_2\text{CO}_3$  (1.6 equiv),  $\text{MePh}_3\text{P}^+\text{Br}^-$  (1.2 equiv). Then dioxane (1.0 mL) was injected into the Schlenk tube under air atmosphere. The reaction mixture was refluxed for 16h, it was cooled to room temperature, detected by TLC, and extracted with dichloromethane (DCM, 3×5.0 mL). The organic layers were combined, dried over  $\text{MgSO}_4$ , and concentrated under reduced pressure to yield the crude product, which was purified by flash chromatography (silica gel, petroleum ether/ethyl acetate = 15:1 to 9:1), affording the desired product **5** as a white solid (41.4 mg, 93% yield).

(2) A 10 mL Schlenk tube was charged with **5** (44.6 mg, 0.2 mmol), KOH (20 equiv). Then EtOH (1.0 mL) was injected into the Schlenk tube under air atmosphere. The reaction tube was placed in an oil bath. After the reaction was carried out at 100 °C for 20 h, it was cooled to room temperature and detected by TLC, which was purified by flash chromatography (silica gel, petroleum ether/ethyl acetate = 15:1 to 7:1), affording the desired product **6** as a brown oil (20.2 mg, 85% yield).

(3) A 10 mL Schlenk tube was charged with **3b** (47.8 mg, 0.2 mmol), NaOH (10 equiv). Then MeOH (1.0 mL) was injected into the Schlenk tube under air atmosphere. The reaction mixture was refluxed for 10 h, it was cooled to room temperature and detected by TLC, which was purified by flash chromatography (silica gel, petroleum ether/ethyl acetate = 15:1 to 7:1), affording the desired product **7** as a white solid (21.6 mg, 89% yield).

(4) A 10 mL Schlenk tube was charged with **3b** (47.8 mg, 0.2 mmol), CoCl<sub>2</sub> (10 mol %), TBHP (5.0 equiv). Then anhydrous MeCN (1.0 mL) was injected into the Schlenk tube under air atmosphere. The reaction tube was placed in an oil bath. After the reaction was carried out at 80 °C for 7h, it was cooled to room temperature, detected by TLC. The solvent was evaporated under reduced pressure. The residue was mixed with water (20 mL), and the resulting solution was extracted with ethyl acetate (3 × 5 mL). The combined organic phases were washed with brine and dried with anhydrous MgSO<sub>4</sub>, and concentrated under reduced pressure to yield the crude product, which was purified by flash chromatography (silica gel, petroleum ether/ethyl acetate = 20:1 to 9:1), affording the desired product **8** as a white solid (37.0 mg, 78% yield).

## 7. Characterization data for the products

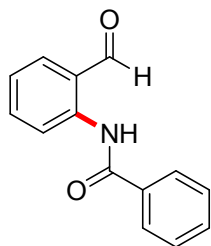

***N*-(2-Formylphenyl)benzamide (3a):** White solid; 36.0 mg, 80% yield; m.p. 69–71 °C;  $^1\text{H}$  NMR (400 MHz,  $\text{CDCl}_3$ )  $\delta$ : 12.09 (s, 1H), 10.00 (s, 1H), 8.97 (d,  $J = 8.4$  Hz, 1H), 8.09–8.07 (m, 2H), 7.75–7.73 (m, 1H), 7.71–7.66 (m, 1H), 7.59–7.52 (m, 3H), 7.30–7.26 (m, 1H);  $^{13}\text{C}$  NMR (100 MHz,  $\text{CDCl}_3$ )  $\delta$ : 195.84, 166.10, 141.23, 136.34, 136.15, 134.31, 132.18, 128.85, 127.49, 123.01, 121.99, 119.96. The NMR data agree with those in a literature report.<sup>4</sup>

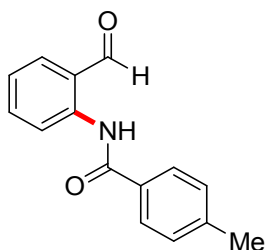

***N*-(2-Formylphenyl)-4-methylbenzamide (3b):** White solid; 34.4 mg, 72% yield; m.p. 83–85 °C;  $^1\text{H}$  NMR (400 MHz,  $\text{CDCl}_3$ )  $\delta$ : 12.03 (s, 1H), 9.97 (s, 1H), 9.94 (d,  $J = 8.4$  Hz, 1H), 7.96 (d,  $J = 8.2$  Hz, 2H), 7.71–7.68 (m, 1H), 7.67–7.63 (m, 1H), 7.32 (d,  $J = 8.0$  Hz, 2H), 7.25–7.21 (m, 1H);  $^{13}\text{C}$  NMR (100 MHz,  $\text{CDCl}_3$ )  $\delta$ : 195.76, 166.06, 142.73, 141.32, 136.25, 136.09, 131.48, 129.48, 127.47, 122.80, 121.89, 119.87, 21.44. HRMS (ESI) ( $[\text{M}+\text{H}]^+$ ) Calcd. For  $[\text{C}_{15}\text{H}_{14}\text{NO}_2]^+$ : 240.1019, Found: 240.1021. The NMR data agree with those in a literature report.<sup>5</sup>

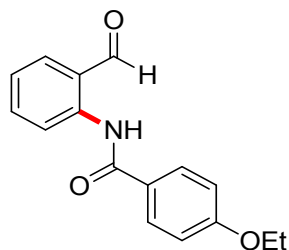

**4-Ethoxy-*N*-(2-formylphenyl)benzamide (3c):** White solid; 35.0 mg, 65% yield; m.p. 95–97 °C;  $^1\text{H}$  NMR (400 MHz,  $\text{CDCl}_3$ )  $\delta$ : 12.02 (s, 1H), 10.01 (s, 1H), 8.96 (d,  $J = 8.4$  Hz, 1H), 8.05 (d,  $J = 8.8$  Hz, 2H), 7.74–7.72 (m, 1H), 7.70–7.66 (m, 1H), 7.27–7.24 (m, 1H), 7.01 (d,  $J = 8.8$  Hz, 2H), 4.13 (q,  $J = 7.0$  Hz, 2H), 1.47 (t,  $J = 7.0$  Hz, 3H);  $^{13}\text{C}$  NMR (100 MHz,  $\text{CDCl}_3$ )  $\delta$ : 195.86, 165.78, 162.27, 141.64, 136.37, 136.15, 129.48, 126.46, 122.71, 121.92, 119.93, 114.57, 63.75, 14.69. HRMS (ESI) ( $[\text{M}+\text{H}]^+$ ) Calcd. For  $[\text{C}_{16}\text{H}_{16}\text{NO}_3]^+$ : 270.1125, Found: 270.1129.

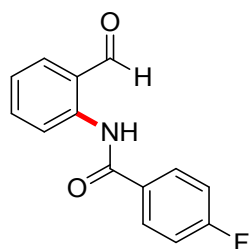

**4-Fluoro-*N*-(2-formylphenyl)benzamide (3d):** White solid; 34.4 mg, 71% yield; m.p. 90–92 °C;  $^1\text{H}$  NMR (400 MHz,  $\text{CDCl}_3$ )  $\delta$ : 12.06 (s, 1H), 10.00 (s, 1H), 8.93 (d,  $J = 8.5$  Hz, 1H), 8.11–8.07 (m, 2H), 7.75–7.73 (m, 1H), 7.71–7.66 (m, 1H), 7.30–7.28 (m, 1H), 7.23–7.19 (m, 2H);  $^{13}\text{C}$  NMR (100 MHz,  $\text{CDCl}_3$ )  $\delta$ : 195.97, 165.16 (d,  $J = 251.7$  Hz), 164.95, 141.12, 136.30 (d,  $J = 23.0$  Hz), 130.45 (d,  $J = 2.9$  Hz), 129.97, 129.87, 123.12, 121.91, 119.87, 115.92 (d,  $J = 21.9$  Hz). HRMS (ESI) ( $[\text{M}+\text{H}]^+$ ) Calcd. For  $[\text{C}_{14}\text{H}_{11}\text{FNO}_2]^+$ : 244.0768, Found: 244.0771. The NMR data agree with those in a literature report.<sup>5</sup>



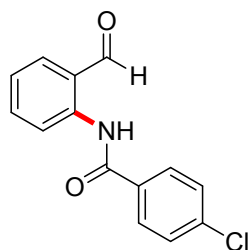

**4-Chloro-*N*-(2-formylphenyl)benzamide (3e):** White solid; 39.9 mg, 77% yield; m.p. 76–78 °C;  $^1\text{H}$  NMR (400 MHz,  $\text{CDCl}_3$ )  $\delta$ : 12.08 (s, 1H), 9.99 (s, 1H), 8.92 (d,  $J = 8.4$  Hz, 1H), 8.02–8.00 (m, 2H), 7.75–7.72 (m, 1H), 7.70–7.66 (m, 1H), 7.52–7.49 (m, 2H), 7.30–7.28 (m, 1H);  $^{13}\text{C}$  NMR (100 MHz,  $\text{CDCl}_3$ )  $\delta$ : 195.94, 164.98, 141.03, 138.56, 136.41, 136.16, 132.68, 129.12, 128.90, 123.22, 121.97, 119.94. HRMS (ESI) ( $[\text{M}+\text{H}]^+$ ) Calcd. For  $[\text{C}_{14}\text{H}_{11}\text{ClNO}_2]^+$ : 260.0473, Found: 260.0475. The NMR data agree with those in a literature report.<sup>5</sup>

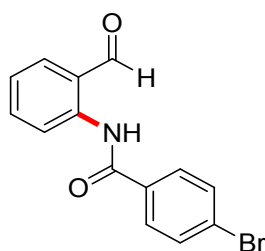

**4-Bromo-*N*-(2-formylphenyl)benzamide (3f):** White solid; 44.1 mg, 73% yield; m.p. 110–112 °C;  $^1\text{H}$  NMR (400 MHz,  $\text{CDCl}_3$ )  $\delta$ : 12.10 (s, 1H), 10.01 (s, 1H), 8.94 (d,  $J = 8.4$  Hz, 1H), 7.96–7.94 (m, 2H), 7.77–7.74 (m, 1H), 7.72–7.68 (m, 3H), 7.32–7.28 (m, 1H);  $^{13}\text{C}$  NMR (100 MHz,  $\text{CDCl}_3$ )  $\delta$ : 195.94, 165.05, 140.98, 136.41, 136.17, 133.10, 132.09, 129.04, 127.10, 123.23, 121.93, 119.90. HRMS (ESI) ( $[\text{M}+\text{H}]^+$ ) Calcd. For  $[\text{C}_{14}\text{H}_{11}\text{BrNO}_2]^+$ : 303.9968, Found: 303.9969. The NMR data agree with those in a literature report.<sup>6</sup>

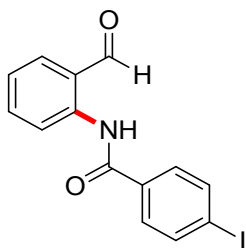

***N*-(2-Formylphenyl)-4-iodobenzamide (3g):** White solid; 43.5 mg, 62% yield; m.p. 124–126 °C;  $^1\text{H}$  NMR (400 MHz,  $\text{CDCl}_3$ )  $\delta$ : 12.07 (s, 1H), 9.99 (s, 1H), 8.92 (d,  $J$  = 8.5 Hz, 1H), 7.90–7.88 (m, 2H), 7.79–7.77 (m, 2H), 7.74–7.72 (m, 1H), 7.70–7.66 (m, 1H), 7.30–7.26 (m, 1H);  $^{13}\text{C}$  NMR (100 MHz,  $\text{CDCl}_3$ )  $\delta$ : 195.91, 165.32, 141.05, 138.14, 136.41, 136.17, 133.80, 129.02, 123.26, 122.04, 120.01, 99.54. HRMS (ESI) ( $[\text{M}+\text{H}]^+$ ) Calcd. For  $[\text{C}_{14}\text{H}_{11}\text{INO}_2]^+$ : 351.9829, Found:351.9833.

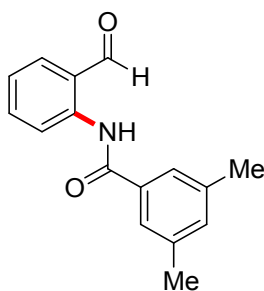

***N*-(2-Formylphenyl)-3,5-dimethylbenzamide (3h):** White solid; 31.9 mg, 63% yield; m.p. 107–109 °C;  $^1\text{H}$  NMR (400 MHz,  $\text{CDCl}_3$ )  $\delta$ : 12.01 (s, 1H), 10.00 (s, 1H), 8.95 (d,  $J$  = 8.4 Hz, 1H), 7.73–7.71 (m, 1H), 7.70–7.65 (m, 3H), 7.28–7.24 (m, 1H), 7.21 (s, 1H), 2.43 (s, 6H);  $^{13}\text{C}$  NMR (100 MHz,  $\text{CDCl}_3$ )  $\delta$ : 195.71, 166.63, 141.36, 138.53, 136.32, 136.11, 134.41, 133.85, 125.30, 122.88, 122.01, 120.02, 21.33. HRMS (ESI) ( $[\text{M}+\text{H}]^+$ ) Calcd. For  $[\text{C}_{16}\text{H}_{16}\text{NO}_2]^+$ : 254.1176, Found: 254.1177.

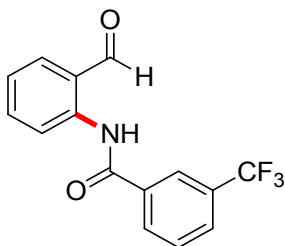

***N*-(2-Formylphenyl)-3-(trifluoromethyl)benzamide (3i)**: White solid; 42.8 mg, 73% yield; m.p. 84–86 °C; <sup>1</sup>H NMR (400 MHz, CDCl<sub>3</sub>) δ: 12.21 (s, 1H), 10.01 (s, 1H), 8.93 (d, *J* = 8.4 Hz, 1H), 8.37 (s, 1H), 8.24 (d, *J* = 8.0 Hz, 1H), 7.84 (d, *J* = 8.0 Hz, 1H), 7.76 (dd, *J*<sub>1</sub> = 7.6 Hz, *J*<sub>2</sub> = 1.6 Hz, 1H), 7.73–7.67 (m, 2H), 7.33–7.29 (m, 1H); <sup>13</sup>C NMR (100 MHz, CDCl<sub>3</sub>) δ: 196.03, 164.55, 140.85, 136.49, 136.20, 135.19, 131.55 (q, *J* = 32.9 Hz), 130.25, 129.50, 128.71 (q, *J* = 3.5 Hz), 124.97 (q, *J* = 4.2 Hz), 123.50, 122.07, 120.02. HRMS (ESI) ([M+H]<sup>+</sup>) Calcd. For [C<sub>15</sub>H<sub>11</sub>F<sub>3</sub>NO<sub>2</sub>]<sup>+</sup>: 294.0736, Found: 294.0737.

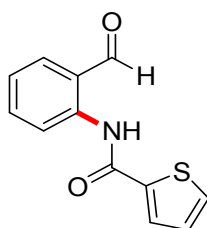

***N*-(2-Formylphenyl)thiophene-2-carboxamide (3j)**: White solid; 31.0 mg, 67% yield; m.p. 110–112 °C; <sup>1</sup>H NMR (400 MHz, CDCl<sub>3</sub>) δ: 12.06 (s, 1H), 10.00 (s, 1H), 8.86 (d, *J* = 8.4 Hz, 1H), 7.86–7.85 (m, 1H), 7.74–7.72 (m, 1H), 7.70–7.65 (m, 1H), 7.62–7.60 (m, 1H), 7.29–7.25 (m, 1H), 7.20–7.18 (m, 1H); <sup>13</sup>C NMR (100 MHz, CDCl<sub>3</sub>) δ: 195.86, 160.79, 141.10, 139.84, 136.39, 136.13, 131.71, 128.97, 128.05, 123.00, 121.71, 119.84. HRMS (ESI) ([M+H]<sup>+</sup>) Calcd. For [C<sub>12</sub>H<sub>10</sub>NO<sub>2</sub>S]<sup>+</sup>: 232.0427, Found: 232.0426. The NMR data agree with those in a literature report.<sup>6</sup>

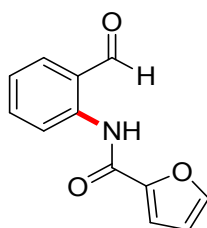

***N*-(2-Formylphenyl)furan-2-carboxamide (3k)**: White solid; 26.2 mg, 61% yield; m.p. 98–100 °C; <sup>1</sup>H NMR (400 MHz, CDCl<sub>3</sub>) δ: 12.07 (s, 1H), 10.00 (s, 1H), 8.88 (d, *J* = 8.4 Hz, 1H), 7.73–7.71 (m, 1H), 7.68–7.64 (m, 2H), 7.29–7.25 (m, 2H), 6.58–6.57 (m, 1H); <sup>13</sup>C NMR (100 MHz, CDCl<sub>3</sub>) δ: 195.42, 157.04, 147.76, 145.10, 140.51, 136.12, 136.01, 123.05, 121.92, 119.95, 115.67, 112.35. HRMS (ESI)

([M+H]<sup>+</sup>) Calcd. For [C<sub>12</sub>H<sub>10</sub>NO<sub>3</sub>]<sup>+</sup>: 216.0655, Found: 216.0652. The NMR data agree with those in a literature report.<sup>6</sup>

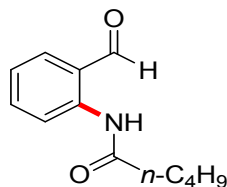

**N-(2-Formylphenyl)pentanamide (3l):** Colorless liquid; 32.8 mg, 80% yield; <sup>1</sup>H NMR (400 MHz, CDCl<sub>3</sub>) δ: 11.14 (s, 1H), 9.93 (s, 1H), 8.77 (d, *J* = 8.4 Hz, 1H), 7.69–7.66 (m, 1H), 7.64–7.60 (m, 1H), 7.25–7.21 (m, 1H), 2.47 (t, *J* = 7.4 Hz, 2H), 1.80–1.72 (m, 2H), 1.49–1.39 (m, 2H), 0.97 (t, *J* = 7.4 Hz, 3H); <sup>13</sup>C NMR (100 MHz, CDCl<sub>3</sub>) δ: 195.51, 172.85, 141.08, 136.18, 135.99, 122.70, 121.57, 119.89, 38.27, 27.49, 22.30, 13.73. The NMR data agree with those in a literature report.<sup>7</sup>

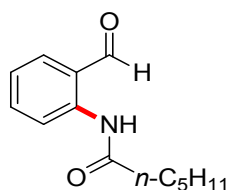

**N-(2-formylphenyl)hexanamide (3m):** colorless liquid; 37.3 mg, 85% yield; <sup>1</sup>H NMR (400 MHz, CDCl<sub>3</sub>) δ: 11.14 (s, 1H), 9.92 (s, 1H), 8.77 (d, *J* = 8.4 Hz, 1H), 7.67–7.65 (m, 1H), 7.62–7.58 (m, 1H), 7.21 (t, *J* = 7.2 Hz, 1H), 2.45 (t, *J* = 7.6 Hz, 2H), 1.80–1.73 (m, 2H), 1.39–1.36 (m, 4H), 0.92 (t, *J* = 6.9 Hz, 3H); <sup>13</sup>C NMR (100 MHz, CDCl<sub>3</sub>) δ: 195.41, 172.75, 141.01, 136.08, 135.92, 122.61, 121.51, 119.80, 38.42, 31.25, 25.02, 22.28, 13.79. The NMR data agree with those in a literature report.<sup>5</sup>

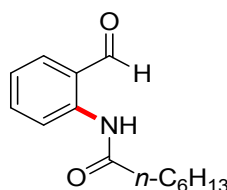

***N*-(2-Formylphenyl)heptanamide (3n)**: Colorless liquid; 38.7 mg, 83% yield;  $^1\text{H}$  NMR (400 MHz,  $\text{CDCl}_3$ )  $\delta$ : 11.15 (s, 1H), 9.92 (s, 1H), 8.77 (d,  $J = 8.4$  Hz, 1H), 7.68–7.66 (m, 1H), 7.63–7.59 (m, 1H), 7.24–7.20 (m, 1H), 2.46 (t,  $J = 7.4$  Hz, 2H), 1.80–1.72 (m, 2H), 1.42–1.30 (m, 6H), 0.89 (t,  $J = 7.0$  Hz, 3H);  $^{13}\text{C}$  NMR (100 MHz,  $\text{CDCl}_3$ )  $\delta$ : 195.50, 172.84, 140.99, 136.14, 135.98, 122.66, 121.46, 119.79, 38.50, 31.45, 28.79, 25.33, 22.43, 13.97. The NMR data agree with those in a literature report.<sup>7</sup>

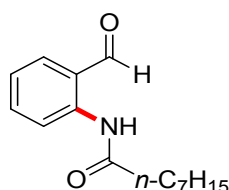

***N*-(2-Formylphenyl)octanamide (3o)**: Colorless liquid; 41.0 mg, 83% yield;  $^1\text{H}$  NMR (400 MHz,  $\text{CDCl}_3$ )  $\delta$ : 11.13 (s, 1H), 9.93 (s, 1H), 8.77 (d,  $J = 8.5$  Hz, 1H), 7.68–7.66 (m, 1H), 7.63–7.59 (m, 1H), 7.24–7.20 (m, 1H), 2.46 (t,  $J = 7.4$  Hz, 2H), 1.78–1.74 (m, 2H), 1.37–1.26 (m, 8H), 0.88 (t,  $J = 6.8$  Hz, 3H);  $^{13}\text{C}$  NMR (100 MHz,  $\text{CDCl}_3$ )  $\delta$ : 195.50, 172.87, 141.09, 136.18, 135.99, 122.69, 121.57, 119.89, 38.56, 31.65, 29.14, 28.97, 25.43, 22.58, 14.02. HRMS (ESI) ( $[\text{M}+\text{H}]^+$ ) Calcd. For  $[\text{C}_{15}\text{H}_{22}\text{NO}_2]^+$ : 248.1645, Found: 248.1642.

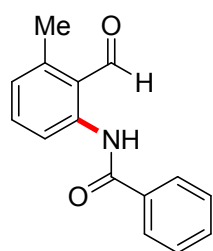

***N*-(2-Formyl-3-methylphenyl)benzamide (4a)**: White solid; 33.1 mg, 69% yield; m.p. 81–83 °C;  $^1\text{H}$  NMR (400 MHz,  $\text{CDCl}_3$ )  $\delta$ : 12.57 (s, 1H), 10.52 (s, 1H), 8.83 (d,  $J = 8.5$  Hz, 1H), 8.09–8.07 (m, 2H), 7.58–7.51 (m, 4H), 6.97 (d,  $J = 7.5$  Hz, 1H), 2.71 (s, 3H);  $^{13}\text{C}$  NMR (100 MHz,  $\text{CDCl}_3$ )  $\delta$ : 194.72, 166.23, 143.33, 142.08, 136.58,

134.62, 132.05, 128.80, 127.52, 125.91, 119.57, 118.54, 19.24. HRMS (ESI) ( $[M+H]^+$ )  
Calcd. For  $[C_{15}H_{14}NO_2]^+$ : 240.1019, Found:240.1017.

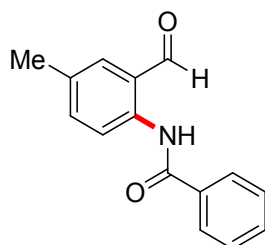

***N*-(2-Formyl-4-methylphenyl)benzamide (4b)**: White solid; 35.1 mg, 73% yield; m.p. 104–106 °C;  $^1H$  NMR (400 MHz,  $CDCl_3$ )  $\delta$ : 11.99 (s, 1H), 9.96 (s, 1H), 8.85 (d,  $J = 8.4$  Hz, 1H), 8.08–8.06 (m, 2H), 7.58–7.48 (m, 5H), 2.42 (s, 3H);  $^{13}C$  NMR (100 MHz,  $CDCl_3$ )  $\delta$ : 195.92, 166.00, 138.93, 137.13, 136.29, 134.47, 132.74, 132.07, 128.83, 127.47, 122.01, 120.03, 20.50. HRMS (ESI) ( $[M+H]^+$ ) Calcd. For  $[C_{15}H_{14}NO_2]^+$ : 240.1019, Found:240.1017.

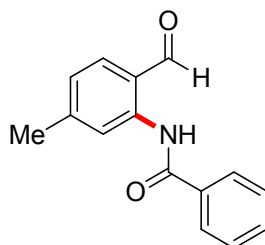

***N*-(2-Formyl-5-methylphenyl)benzamide (4c)**: White solid; 35.9 mg, 75% yield; m.p. 128–130 °C;  $^1H$  NMR (400 MHz,  $CDCl_3$ )  $\delta$ : 12.12 (s, 1H), 9.92 (s, 1H), 8.80 (s, 1H), 8.08–8.06 (m, 2H), 7.60–7.51 (m, 4H), 7.07 (d,  $J = 7.8$  Hz, 1H), 2.47 (s, 3H);  $^{13}C$  NMR (100 MHz,  $CDCl_3$ )  $\delta$ : 195.17, 166.12, 148.18, 141.19, 136.22, 134.34, 132.13, 128.83, 127.47, 124.03, 120.31, 120.01, 22.50. HRMS (ESI) ( $[M+H]^+$ ) Calcd. For  $[C_{15}H_{14}NO_2]^+$ : 240.1019, Found:240.1016.

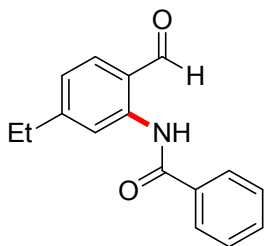

***N*-(5-Ethyl-2-formylphenyl)benzamide (4d):** White solid; 39.5 mg, 78% yield; m.p. 106–108 °C; <sup>1</sup>H NMR (400 MHz, CDCl<sub>3</sub>) δ: 12.13 (s, 1H), 9.92 (s, 1H), 8.84 (s, 1H), 8.09–8.07 (m, 2 H), 7.62 (d, *J* = 8.0 Hz, 1H), 7.58–7.51 (m, 3H), 7.10–7.08 (m, 1H), 2.76 (q, *J* = 7.6 Hz, 2H), 1.30 (t, *J* = 7.6 Hz, 3H); <sup>13</sup>C NMR (100 MHz, CDCl<sub>3</sub>) δ: 195.19, 166.12, 154.26, 141.34, 136.34, 134.35, 132.10, 128.82, 127.45, 122.81, 120.18, 119.29, 29.69, 14.95. HRMS (ESI) ([M+H]<sup>+</sup>) Calcd. For [C<sub>16</sub>H<sub>16</sub>NO<sub>2</sub>]<sup>+</sup>: 254.1176, Found: 254.1176.

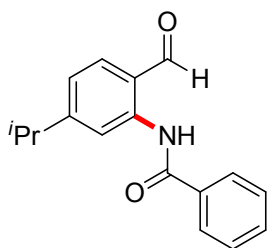

***N*-(2-Formyl-5-isopropylphenyl)benzamide (4e):** White solid; 40.6 mg, 76% yield; m.p. 99–101 °C; <sup>1</sup>H NMR (400 MHz, CDCl<sub>3</sub>) δ: 13.13 (s, 1H), 9.94 (s, 1H), 8.89 (s, 1H), 8.08 (d, *J* = 6.8 Hz, 2H), 7.64 (d, *J* = 8.0 Hz, 1H), 7.58–7.52 (m, 3H), 7.15–7.13 (m, 1H), 3.09–2.98 (m, 1H), 1.33 (s, 3H), 1.31 (s, 3H); <sup>13</sup>C NMR (100 MHz, CDCl<sub>3</sub>) δ: 195.19, 166.21, 158.85, 141.49, 136.39, 134.46, 132.12, 128.86, 127.49, 121.37, 120.40, 118.16, 35.00, 29.67, 23.44. HRMS (ESI) ([M+H]<sup>+</sup>) Calcd. For [C<sub>17</sub>H<sub>18</sub>NO<sub>2</sub>]<sup>+</sup>: 268.1332, Found: 268.1334.

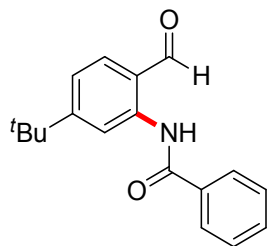

***N*-(5-(*tert*-Butyl)-2-formylphenyl)benzamide (4f):** White solid; 45.1 mg, 80% yield; m.p. 115–117 °C; <sup>1</sup>H NMR (400 MHz, CDCl<sub>3</sub>) δ: 12.11 (s, 1H), 9.96 (s, 1H), 9.10 (d, *J* = 1.6 Hz, 1H), 8.11–8.09 (m, 2H), 7.66 (d, *J* = 8.0 Hz, 1H), 7.59–7.53 (m, 3H), 7.32–7.30 (m, 1H), 1.42 (s, 9H); <sup>13</sup>C NMR (100 MHz, CDCl<sub>3</sub>) δ: 195.20, 166.24, 161.04, 141.24, 136.00, 134.45, 132.11, 128.85, 127.46, 120.40, 119.94, 117.17, 35.86, 30.94. HRMS (ESI) ([M+H]<sup>+</sup>) Calcd. For [C<sub>18</sub>H<sub>20</sub>NO<sub>2</sub>]<sup>+</sup>: 282.1489, Found: 282.1493.

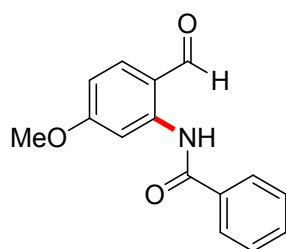

***N*-(2-Formyl-5-methoxyphenyl)benzamide (4g):** White solid; 39.8 mg, 78% yield; m.p. 132–134 °C; <sup>1</sup>H NMR (400 MHz, CDCl<sub>3</sub>) δ: 12.38 (s, 1H), 9.83 (s, 1H), 8.60–8.60 (m, 1H), 8.09–8.07 (m, 2H), 7.60–7.53 (m, 4H), 6.76–6.74 (m, 1H), 3.95 (s, 3H); <sup>13</sup>C NMR (100 MHz, CDCl<sub>3</sub>) δ: 193.70, 166.30, 166.01, 143.69, 137.89, 134.16, 132.16, 128.80, 127.44, 116.06, 110.42, 103.67, 55.74. HRMS (ESI) ([M+H]<sup>+</sup>) Calcd. For [C<sub>15</sub>H<sub>14</sub>NO<sub>3</sub>]<sup>+</sup>: 256.0968, Found: 256.0966.



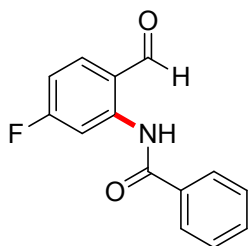

***N*-(5-Fluoro-2-formylphenyl)benzamide (4h):** White solid; 36.0 mg, 74% yield; m.p. 94–96 °C;  $^1\text{H}$  NMR (400 MHz,  $\text{CDCl}_3$ )  $\delta$ : 12.27 (s, 1H), 9.94 (s, 1H), 8.77–8.74 (m, 1H), 8.07–8.06 (m, 2H), 7.75–7.71 (m, 1H), 7.62–7.53 (m, 3H), 6.97–6.92 (m, 1H);  $^{13}\text{C}$  NMR (100 MHz,  $\text{CDCl}_3$ )  $\delta$ : 194.27, 167.43 (d,  $J = 255.3$  Hz), 166.20, 143.61 (d,  $J = 13.8$  Hz), 138.56 (d,  $J = 12.0$  Hz), 133.82, 132.44, 128.90, 127.49, 118.88, 110.48 (d,  $J = 22.9$  Hz), 107.49 (d,  $J = 28.7$  Hz). HRMS (ESI) ( $[\text{M}+\text{H}]^+$ ) Calcd. For  $[\text{C}_{14}\text{H}_{11}\text{FNO}_2]^+$ : 244.0768, Found: 244.0765.

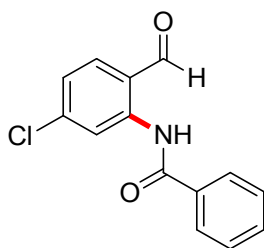

***N*-(5-Chloro-2-formylphenyl)benzamide (4i):** White solid; 40.4 mg, 78% yield; m.p. 99–101 °C;  $^1\text{H}$  NMR (400 MHz,  $\text{CDCl}_3$ )  $\delta$ : 12.14 (s, 1H), 9.95 (s, 1H), 9.05 (s, 1H), 8.06–8.04 (m, 2H), 7.64 (d,  $J = 8.2$  Hz, 1H), 7.60–7.52 (m, 3H), 7.24–7.22 (m, 1H);  $^{13}\text{C}$  NMR (100 MHz,  $\text{CDCl}_3$ )  $\delta$ : 194.69, 166.10, 143.14, 142.01, 133.83, 132.47, 128.94, 127.51, 123.35, 120.31, 120.11. HRMS (ESI) ( $[\text{M}+\text{H}]^+$ ) Calcd. For  $[\text{C}_{14}\text{H}_{11}\text{ClNO}_2]^+$ : 260.0473, Found: 260.0471.

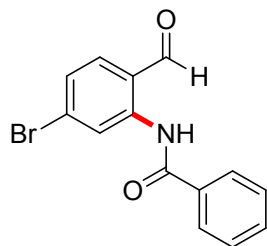

***N*-(5-Bromo-2-formylphenyl)benzamide (4j)**: White solid; 43.1 mg, 71% yield; m.p. 115–117 °C;  $^1\text{H}$  NMR (400 MHz,  $\text{CDCl}_3$ )  $\delta$ : 12.12 (s, 1H), 9.96 (s, 1H), 9.24 (d,  $J$  = 1.6 Hz, 1H), 8.08–8.06 (m, 2H), 7.61–7.54 (m, 4H), 7.44–7.41 (m, 1H);  $^{13}\text{C}$  NMR (100 MHz,  $\text{CDCl}_3$ )  $\delta$ : 194.92, 166.09, 141.87, 136.95, 133.85, 132.49, 132.11, 128.96, 127.53, 126.38, 123.11, 120.64. HRMS (ESI) ( $[\text{M}+\text{H}]^+$ ) Calcd. For  $[\text{C}_{14}\text{H}_{11}\text{BrNO}_2]^+$ : 303.9968, Found: 303.9969.

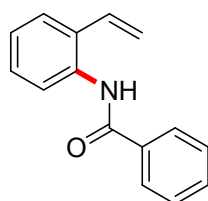

***N*-(2-Vinylphenyl)benzamide (5)**: White solid; 41.4 mg, 93% yield; m.p. 156–158 °C;  $^1\text{H}$  NMR (400 MHz,  $\text{CDCl}_3$ )  $\delta$ : 7.98 (d,  $J$  = 8.0 Hz, 1H), 7.94 (s, 1H), 7.89–7.87 (m, 2H), 7.56–7.53 (m, 1H), 7.50–7.44 (m, 3H), 7.34–7.30 (m, 1H), 7.21–7.17 (m, 1H), 6.86 (dd,  $J$  = 17.4, 11.0 Hz, 1H), 5.70 (dd,  $J$  = 17.4, 1.2 Hz, 1H), 5.45 (dd,  $J$  = 11.0, 1.2 Hz, 1H);  $^{13}\text{C}$  NMR (100 MHz,  $\text{CDCl}_3$ )  $\delta$ : 165.63, 134.70, 134.47, 132.31, 131.85, 130.64, 128.76, 128.52, 127.06, 127.03, 125.41, 123.58, 118.35. The NMR data agree with those in a literature report.<sup>3</sup>

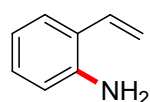

**2-Vinylaniline (6)**: Brown oil; 20.2 mg, 85% yield;  $^1\text{H}$  NMR (400 MHz,  $\text{CDCl}_3$ )  $\delta$ : 7.29–7.27 (m, 1H), 7.11–7.06 (m, 1H), 6.81–6.73 (m, 2H), 6.68 (d,  $J$  = 8.0 Hz, 1H), 5.63 (dd,  $J$  = 17.4, 1.4 Hz, 1H), 5.31 (dd,  $J$  = 11.0, 1.4 Hz, 1H), 3.75 (brs, 2H);  $^{13}\text{C}$

NMR (100 MHz, CDCl<sub>3</sub>)  $\delta$ : 143.63, 132.74, 128.70, 127.32, 124.09, 118.90, 116.05, 115.66. The NMR data agree with those in a literature report.<sup>8</sup>

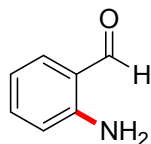

**2-Aminobenzaldehyde (7):** White solid; 21.6 mg, 89% yield; m.p. 39–41 °C; <sup>1</sup>H NMR (400 MHz, CDCl<sub>3</sub>)  $\delta$ : 9.88 (s, 1H), 7.50–7.48 (m, 1H), 7.34–7.30 (m, 1H), 6.78 (t,  $J$  = 7.7 Hz, 1H), 6.66 (d,  $J$  = 8.3 Hz, 1H), 6.13 (brs, 2H); <sup>13</sup>C NMR (100 MHz, CDCl<sub>3</sub>)  $\delta$ : 194.04, 149.87, 135.68, 135.15, 118.84, 116.35, 115.99. The NMR data agree with those in a literature report.<sup>9</sup>

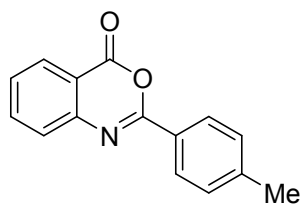

**2-(*p*-Tolyl)-4H-benzo[*d*][1,3]oxazin-4-one (8):** White solid; 37.0 mg, 78% yield; m.p. 154–156 °C; <sup>1</sup>H NMR (400 MHz, CDCl<sub>3</sub>)  $\delta$ : 8.24–8.21 (m, 1H), 8.19 (d,  $J$  = 8.3 Hz, 2H), 7.83–7.87 (m, 1H), 7.67 (d,  $J$  = 7.7 Hz, 1H), 7.51–7.47 (m, 1H), 7.31 (d,  $J$  = 8.1 Hz, 2H), 2.44 (s, 3H); <sup>13</sup>C NMR (100 MHz, CDCl<sub>3</sub>)  $\delta$ : 159.66, 157.29, 147.14, 143.36, 136.45, 129.47, 128.53, 128.29, 127.95, 127.44, 127.07, 116.93, 21.65. HRMS (ESI) ([M+H]<sup>+</sup>) Calcd. For [C<sub>15</sub>H<sub>12</sub>NO<sub>2</sub>]<sup>+</sup>: 238.0863, Found: 238.0868

## 8. References

- [1] R. B. Dateer and S. Chang, *J. Am. Chem. Soc.*, 2015, **137**, 4908.
- [2] Y. Park, K. T. Park, J. G. Kim and S. Chang, *J. Am. Chem. Soc.*, 2015, **137**, 4534.
- [3] L. Fra, A. Millán, J. A. Souto and K. Muñiz, *Angew. Chem., Int. Ed.*, 2014, **53**, 7349.
- [4] P. Seliga and W. Ravenb, *Org. Lett.*, 2014, **16**, 5192.
- [5] D. Zhao, Qi. Shen, Y.-R. Zhou and J.-X. Li, *Org. Biomol. Chem.*, 2013, **11**, 5908.

- [6] J. Yu, D. Zhang-Negrerie and Y. Du, *Eur. J. Org. Chem.*, 2016, **3**, 562.
- [7] K. K. Park and J. Y. Jung, *Heterocycles*, 2005, **65**, 2095.
- [8] M. Arisawa, Y. Fujii, H. Kato, H. Fukuda, T. Matsumoto, M. Ito, H. Abe, Y. Ito and S. Shuto, *Angew. Chem., Int. Ed.*, 2013, **52**, 1003.
- [9] Y. Matano and H. Nomura, *Angew. Chem., Int. Ed.*, 2002, **41**, 3028.

## 9. $^1\text{H}$ and $^{13}\text{C}$ NMR spectra of the products

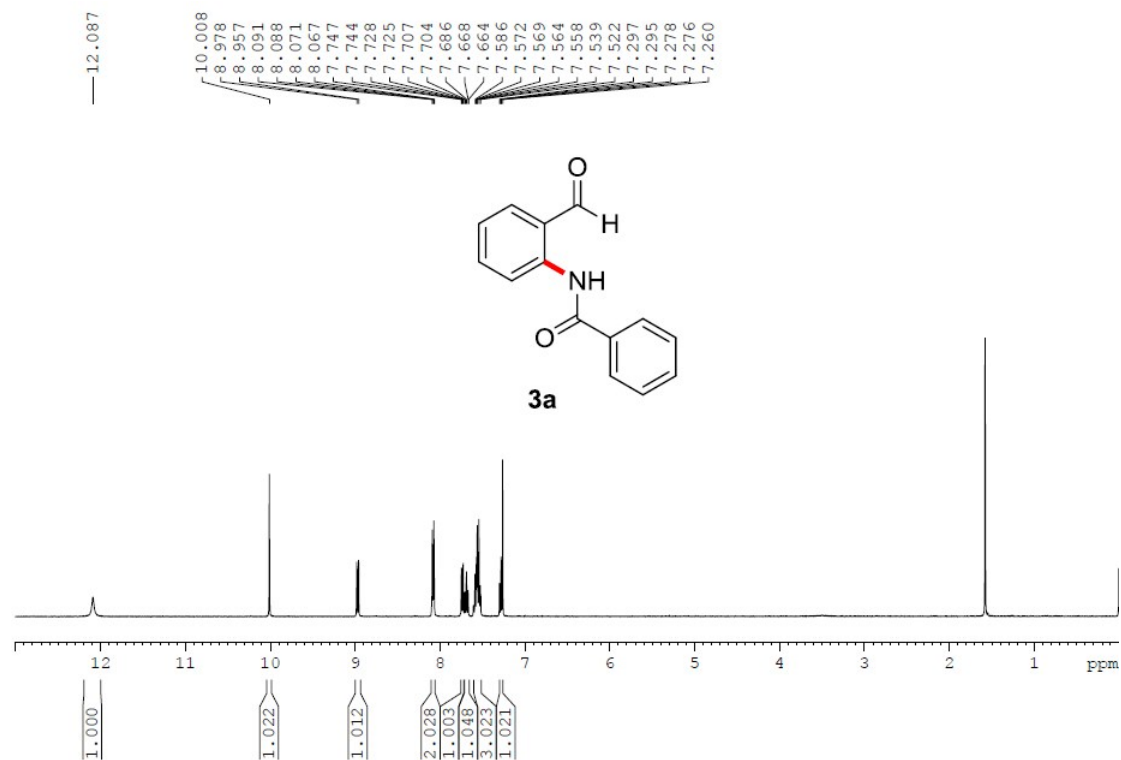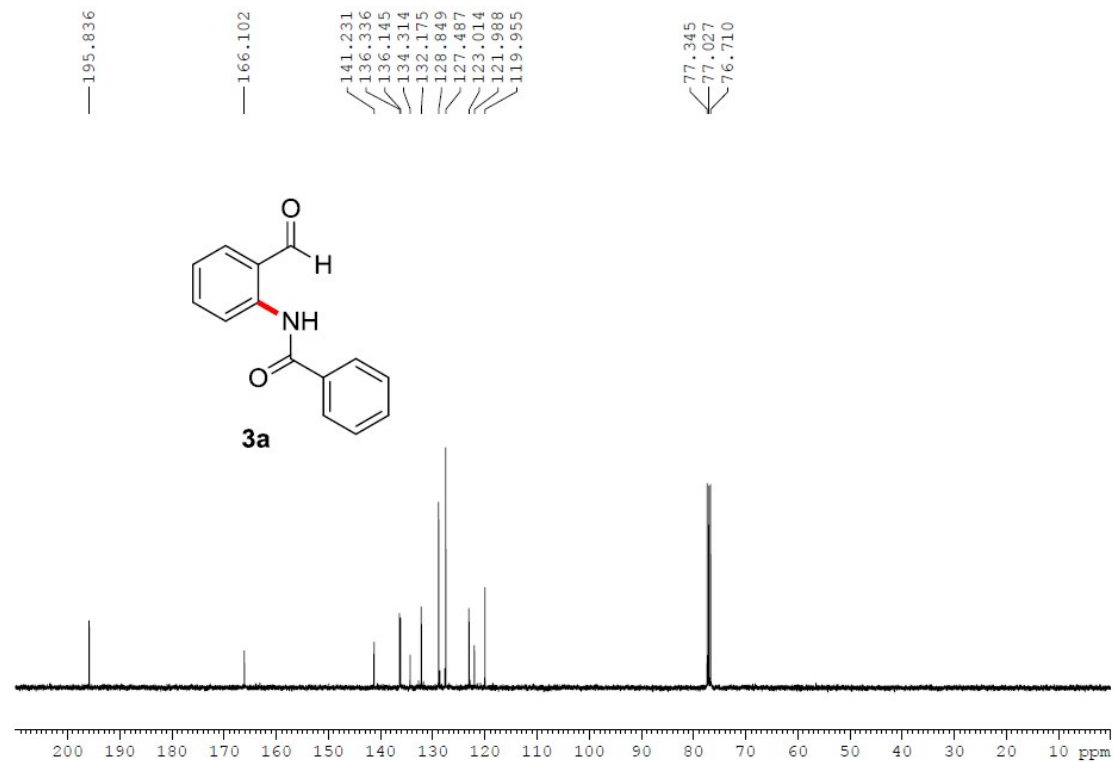

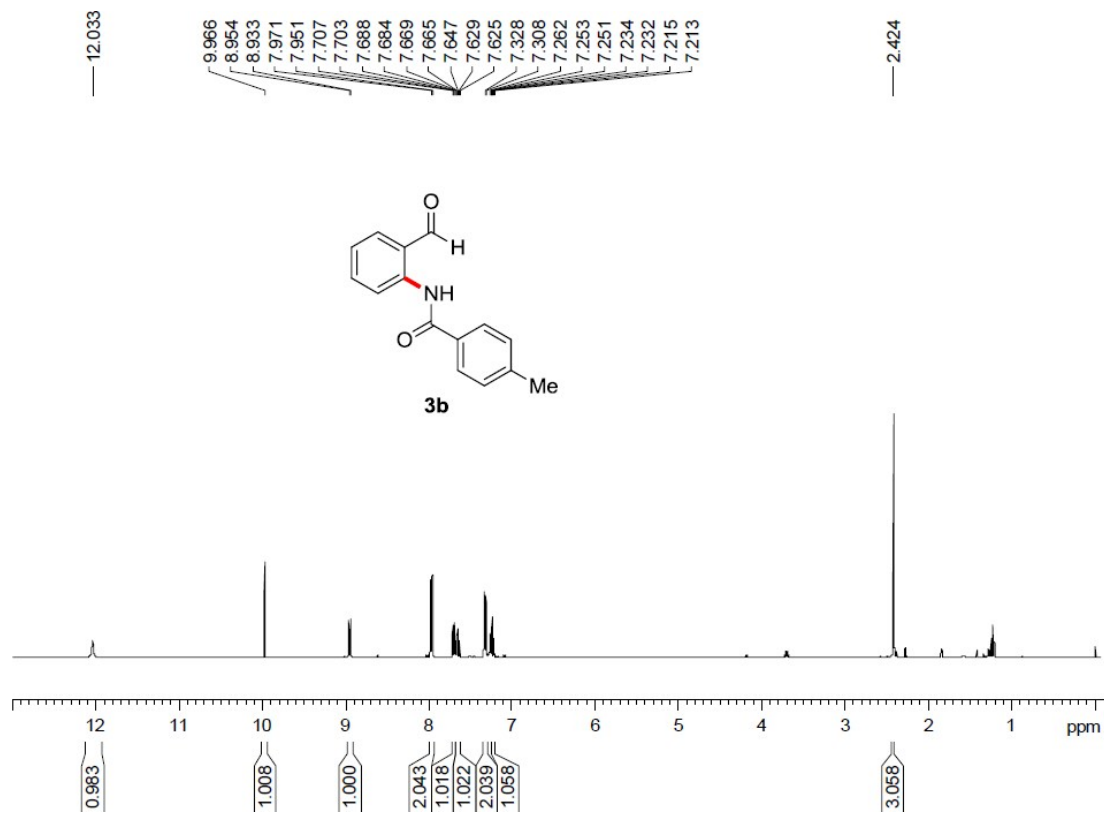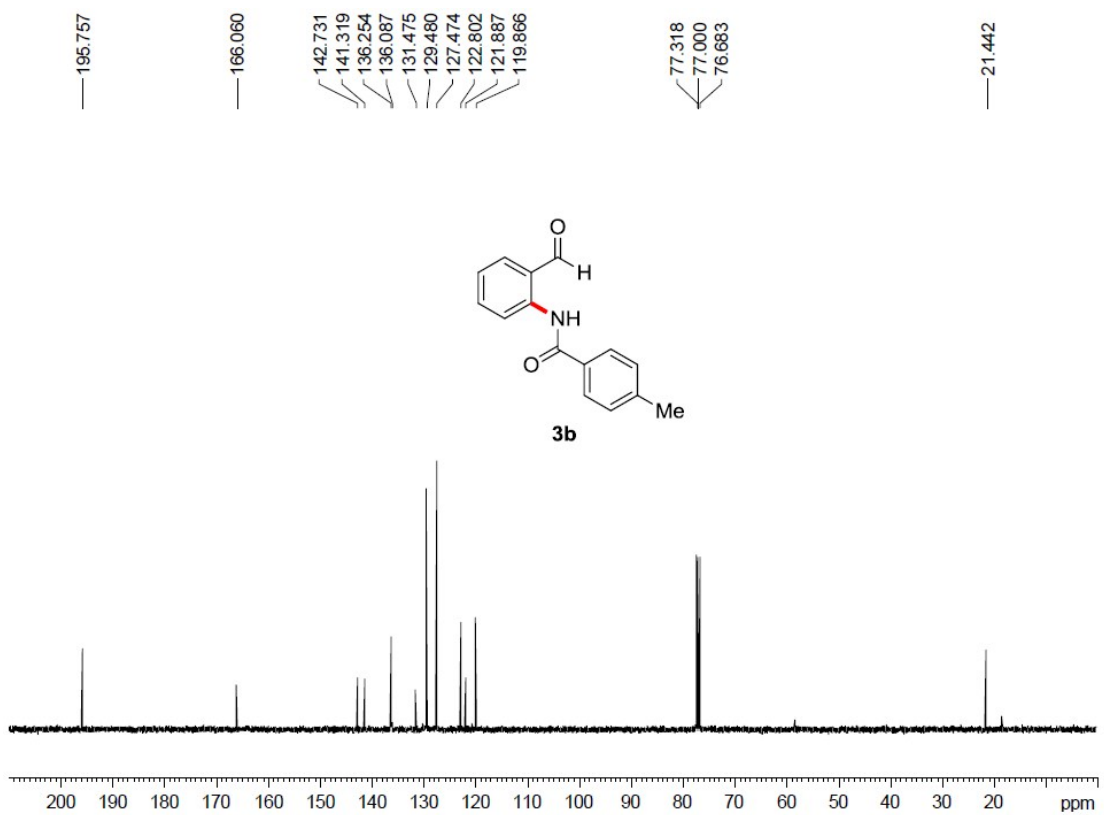

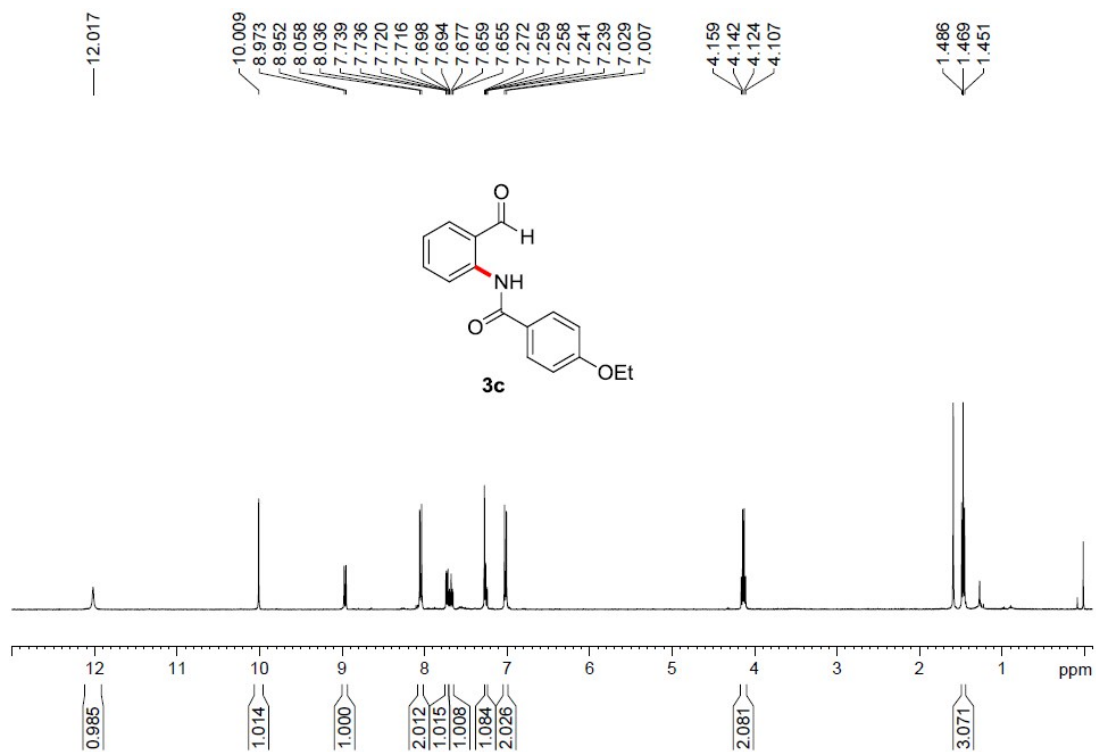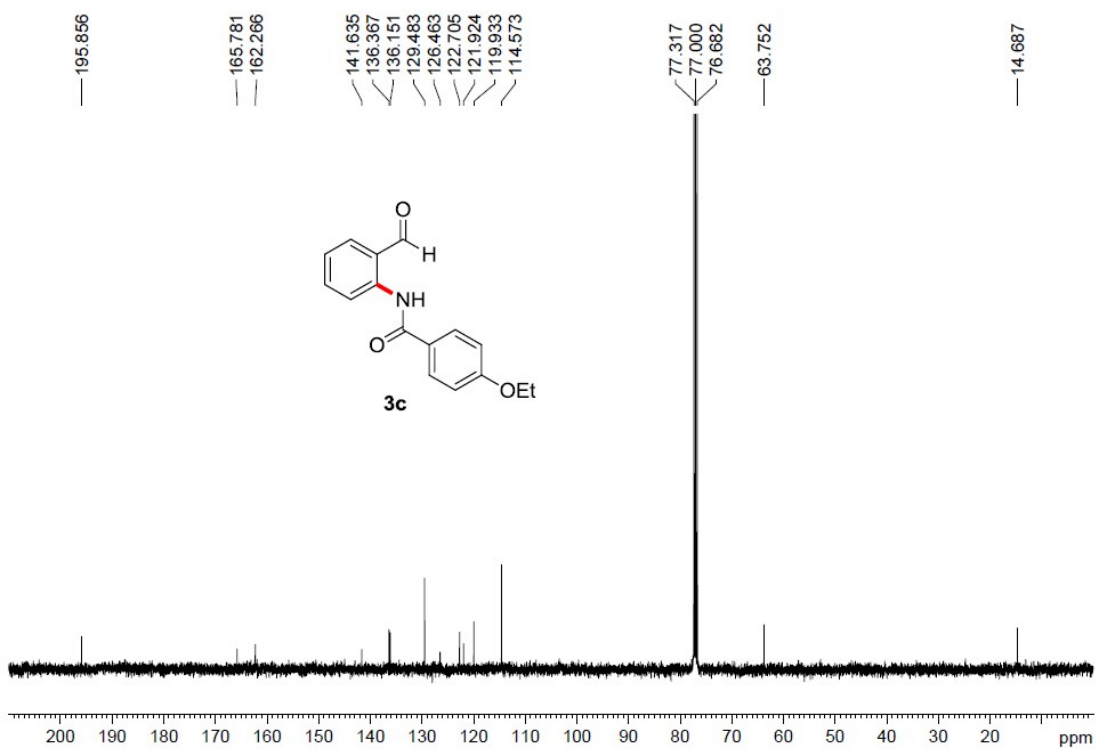

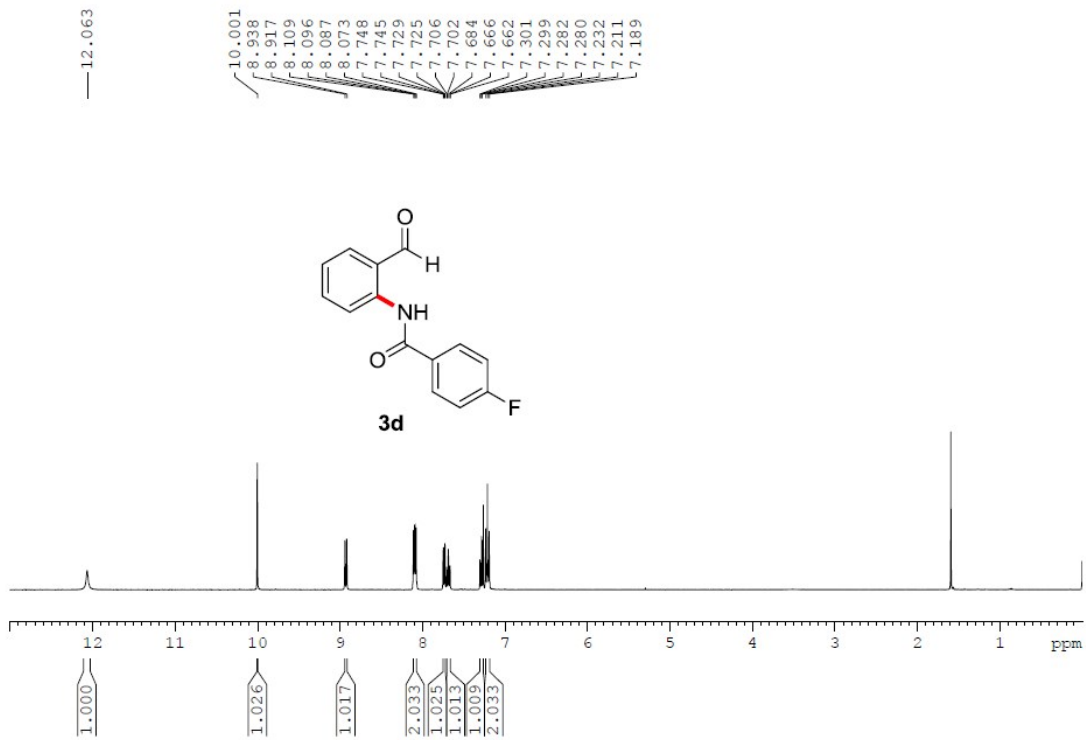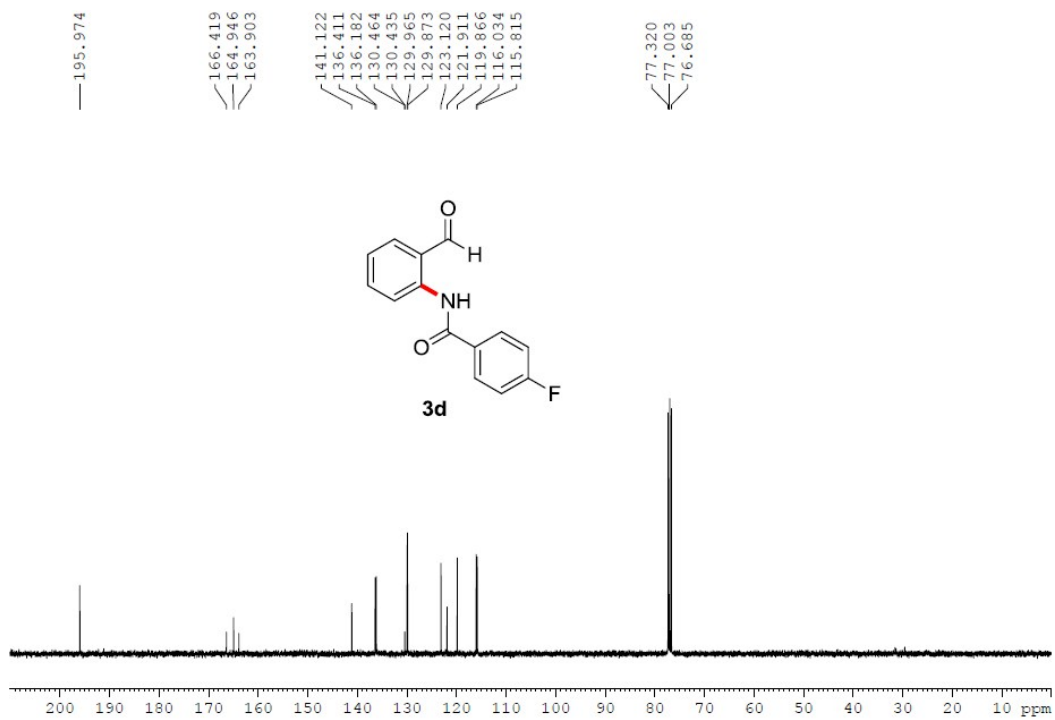



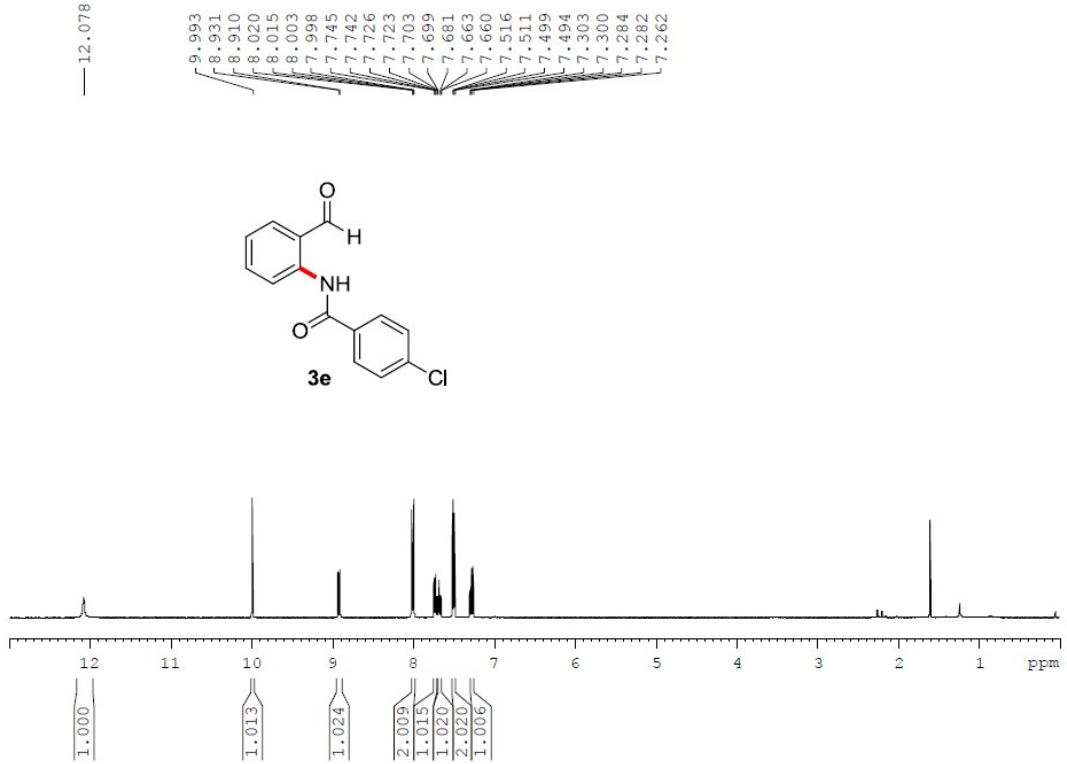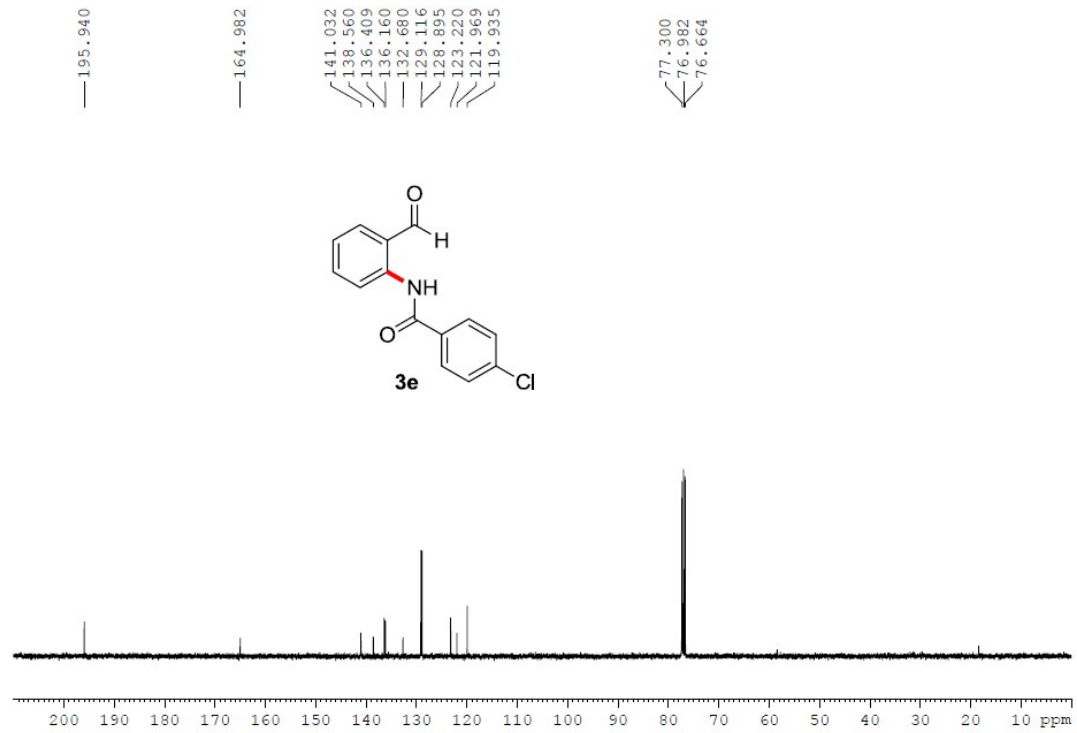

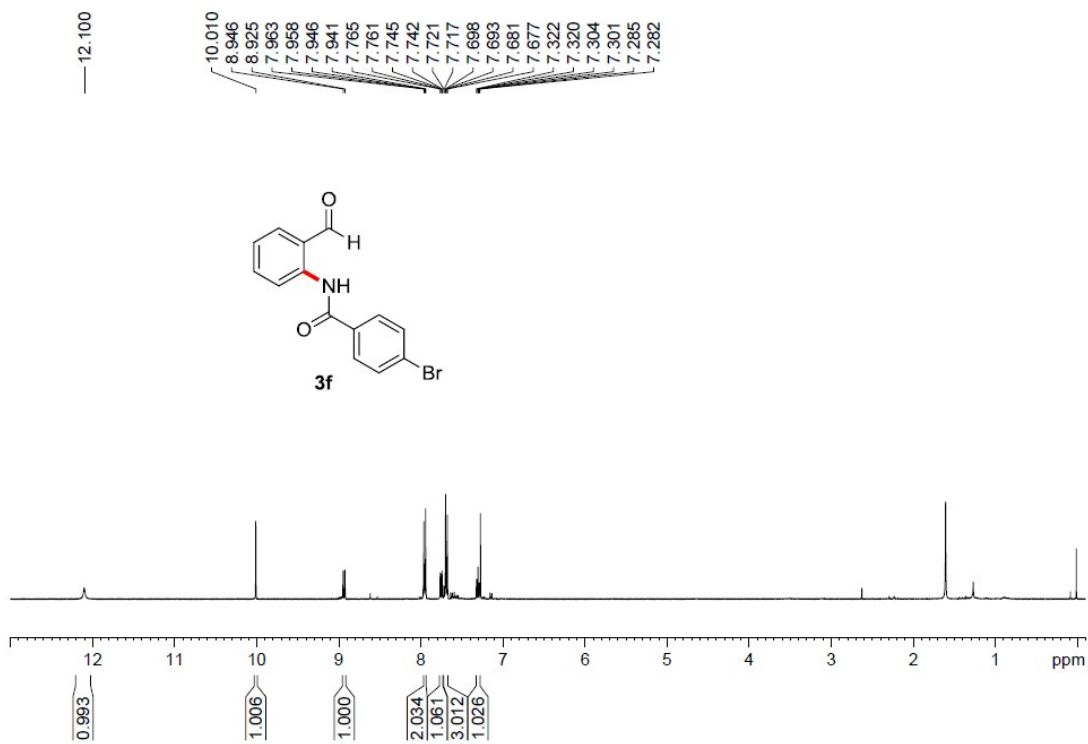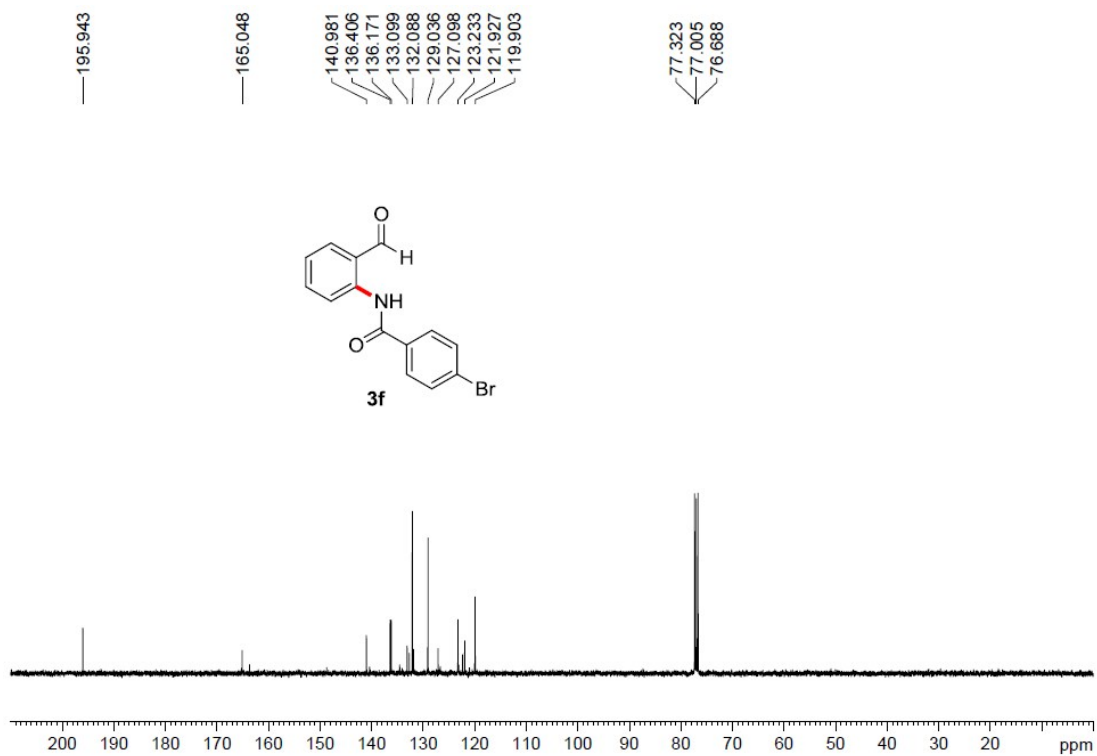

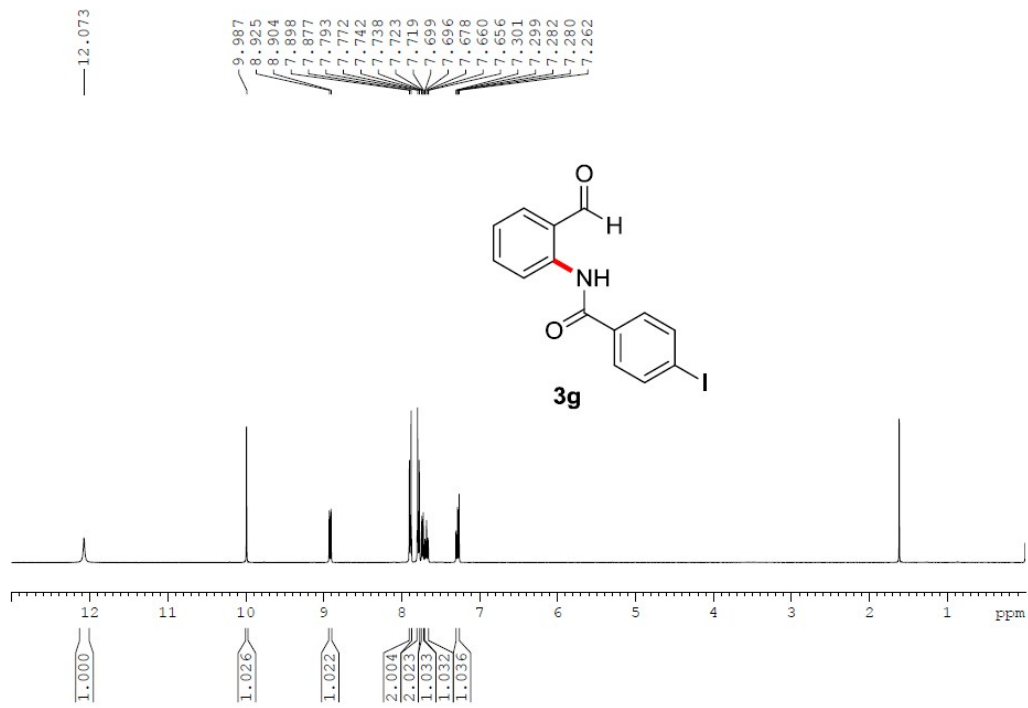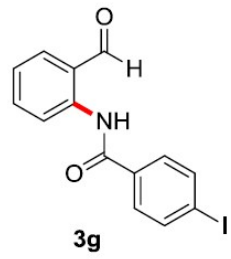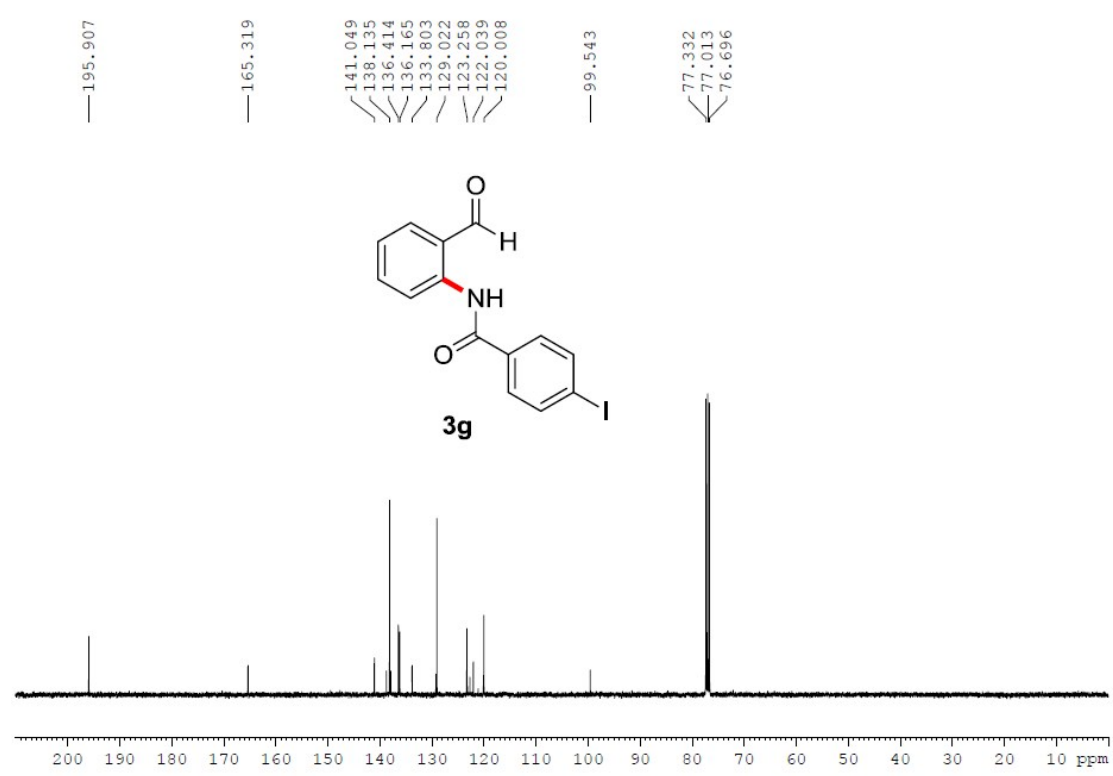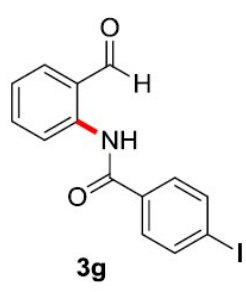

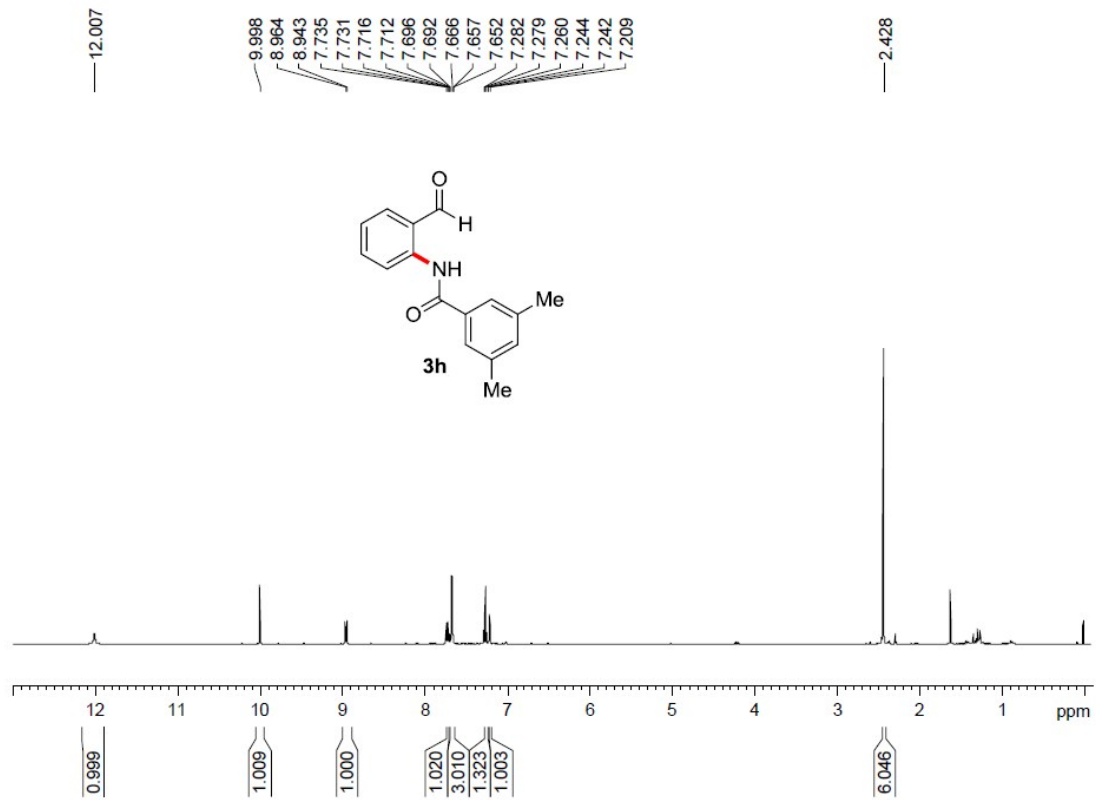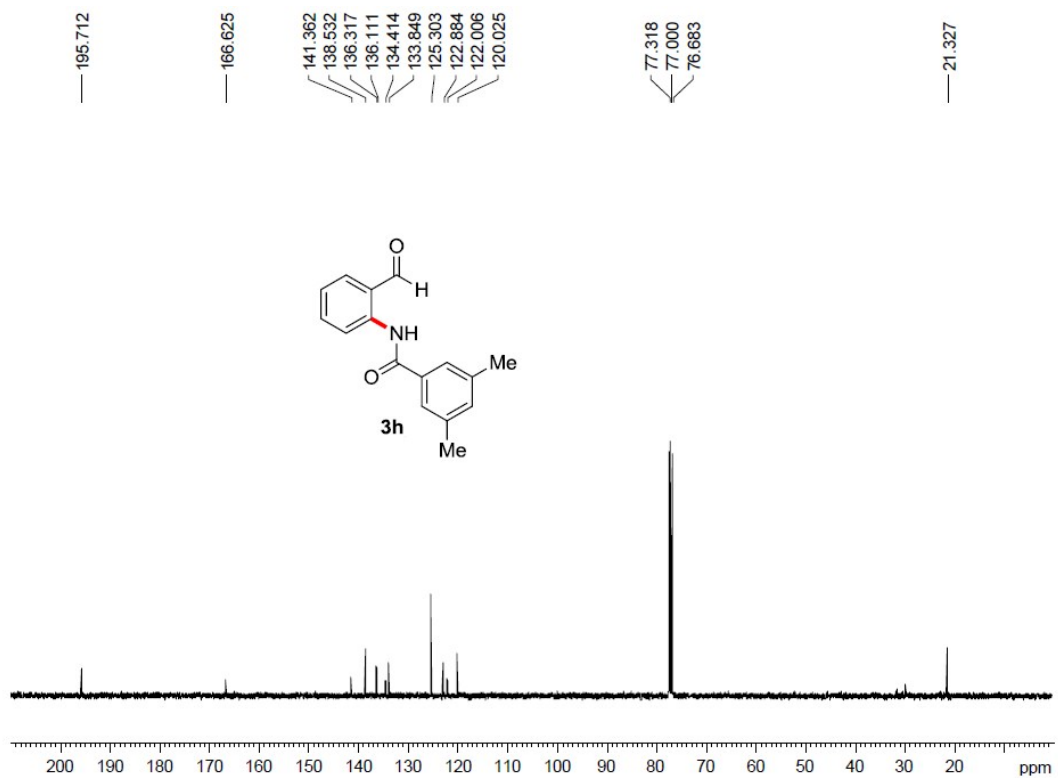

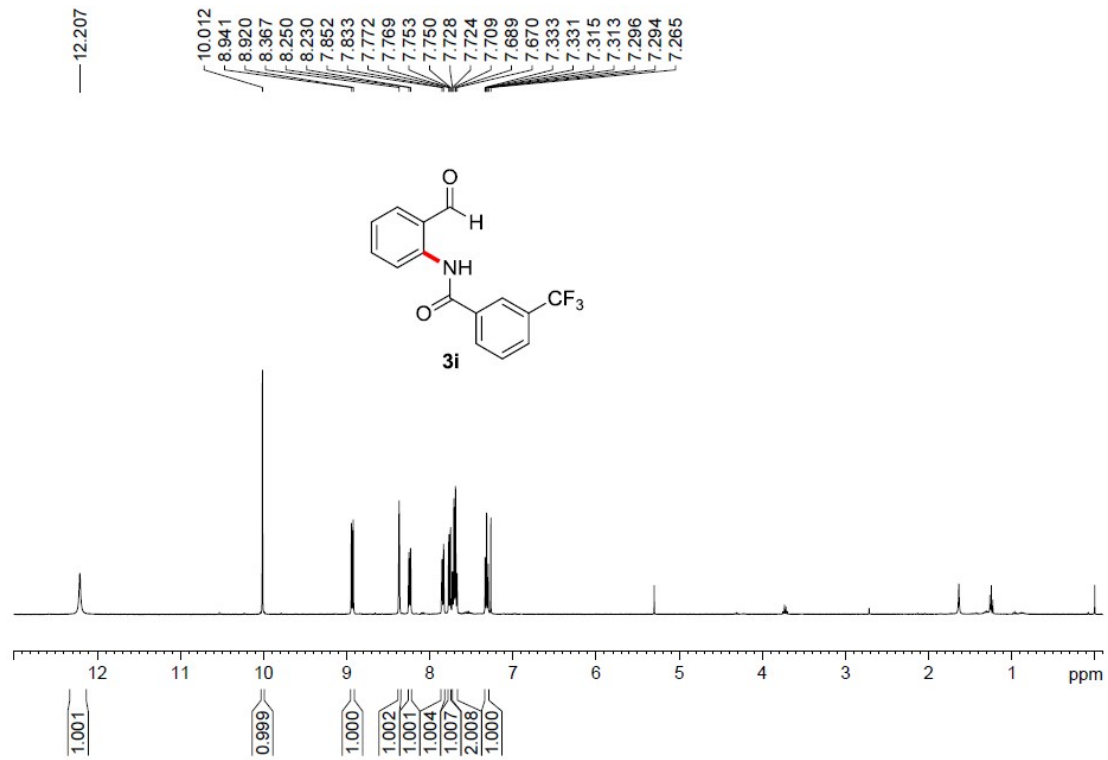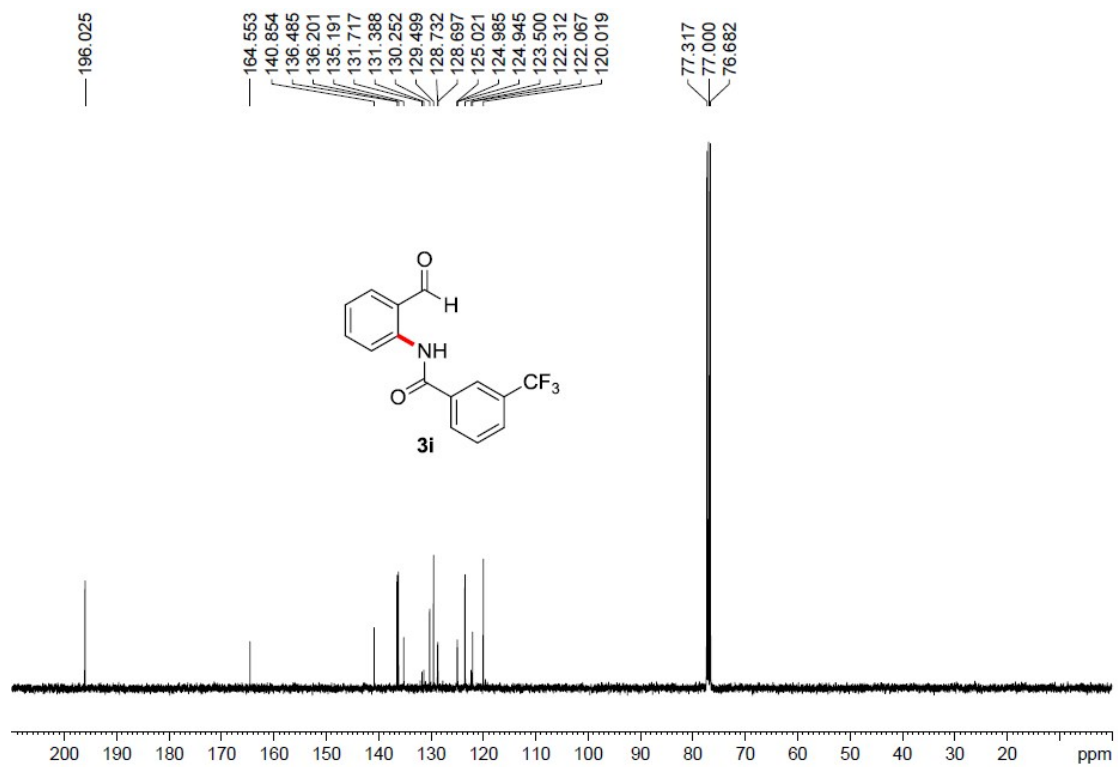

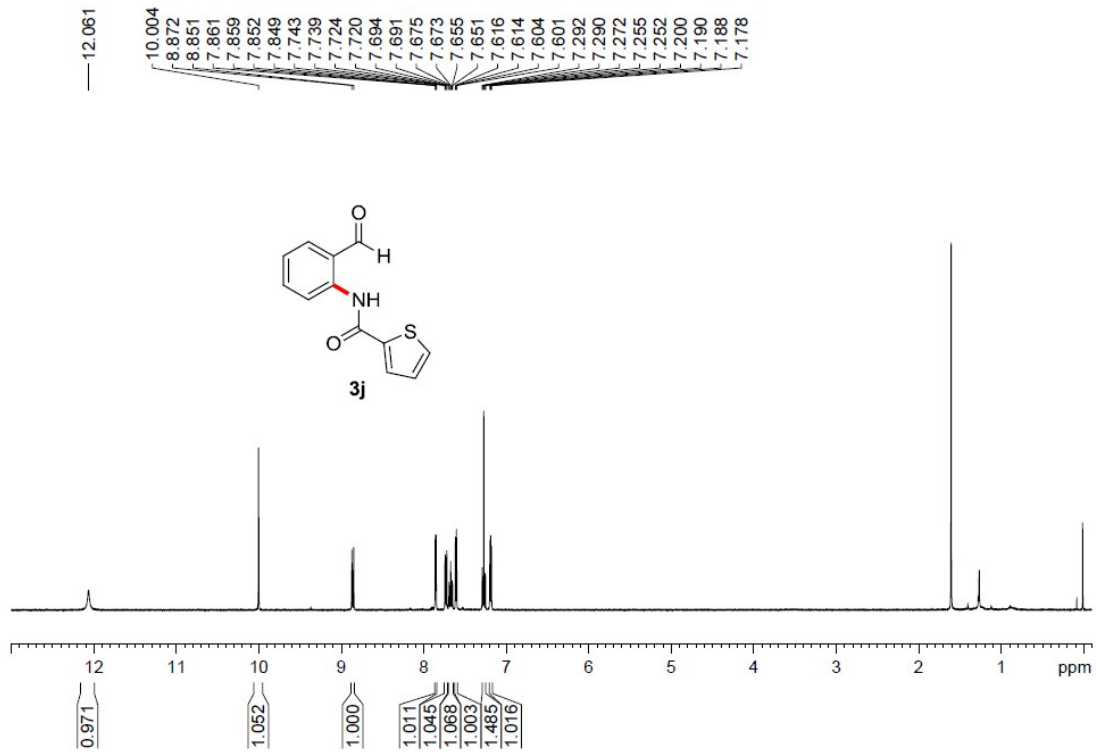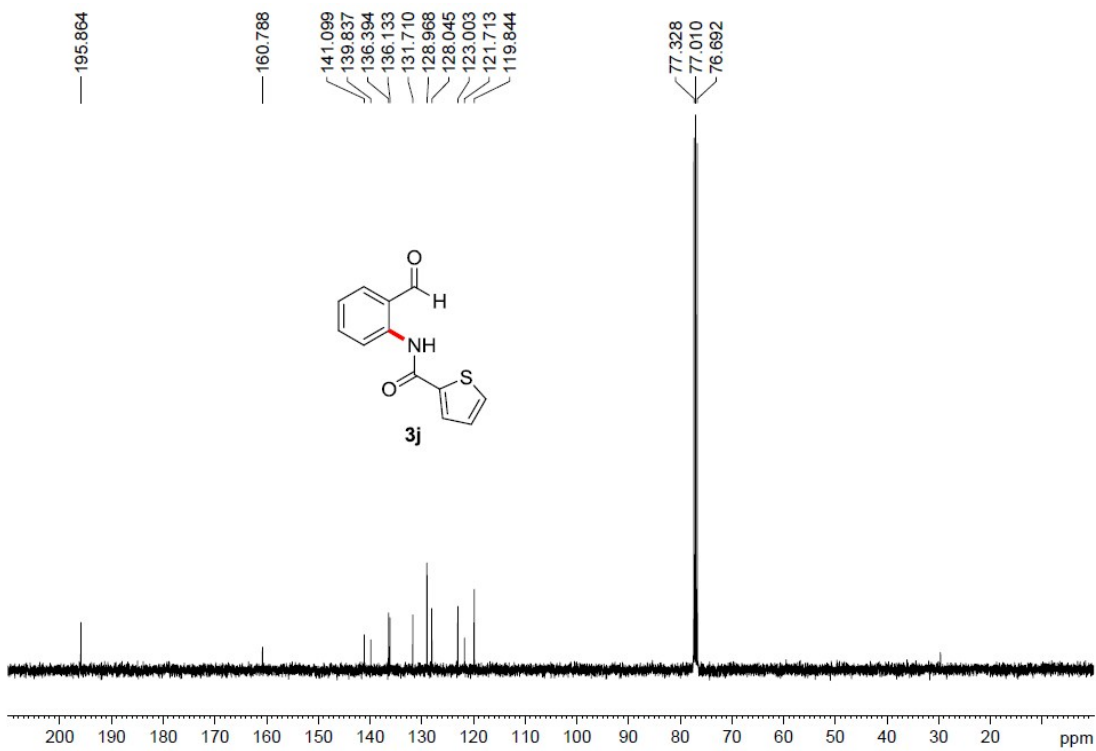

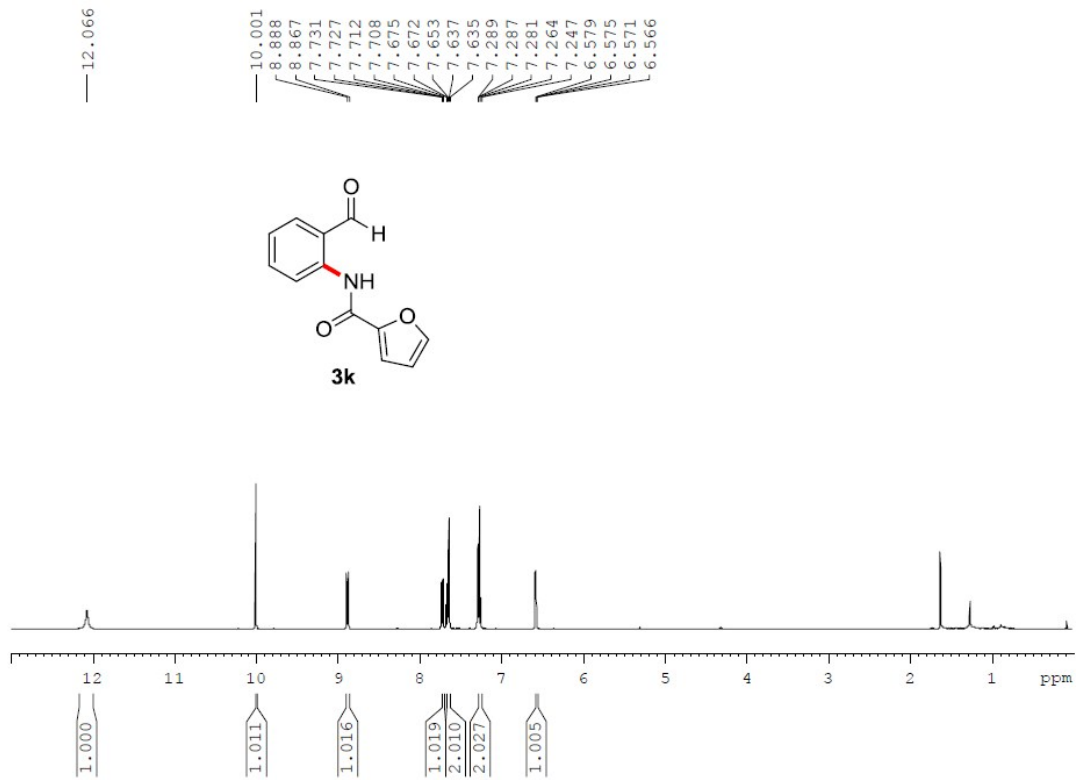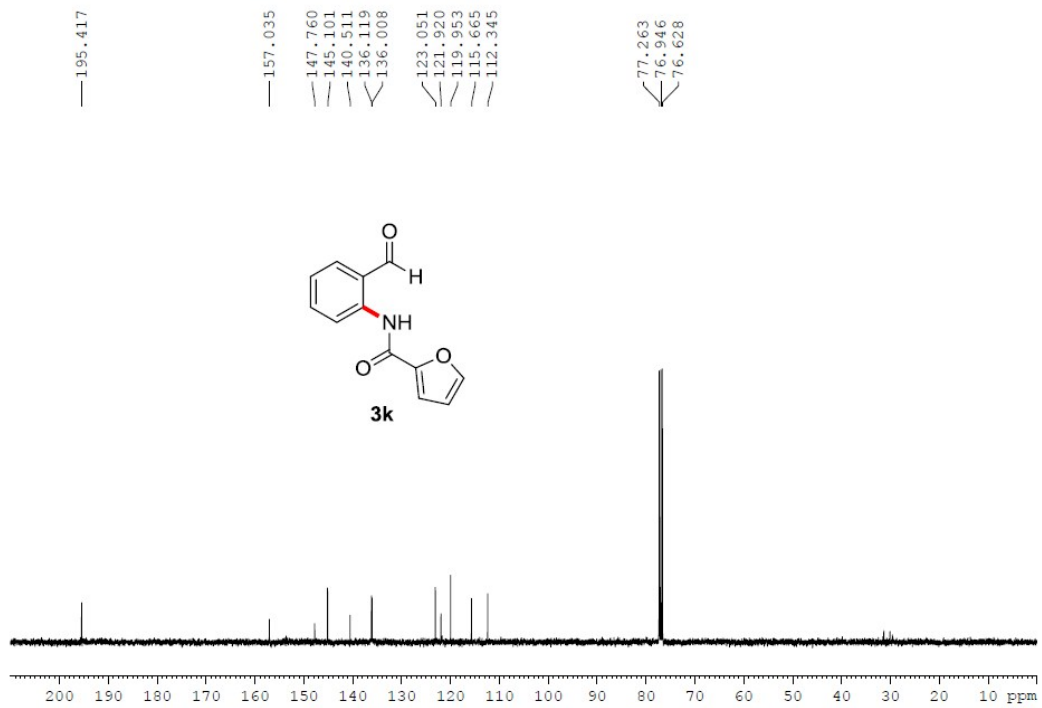

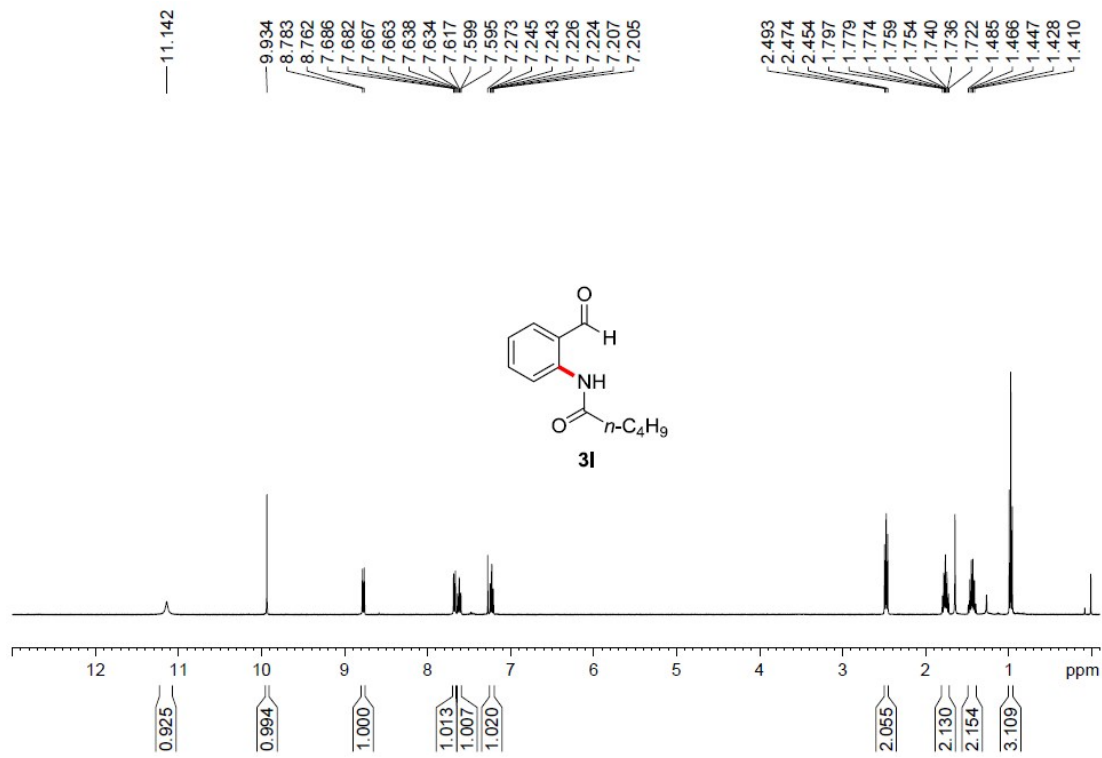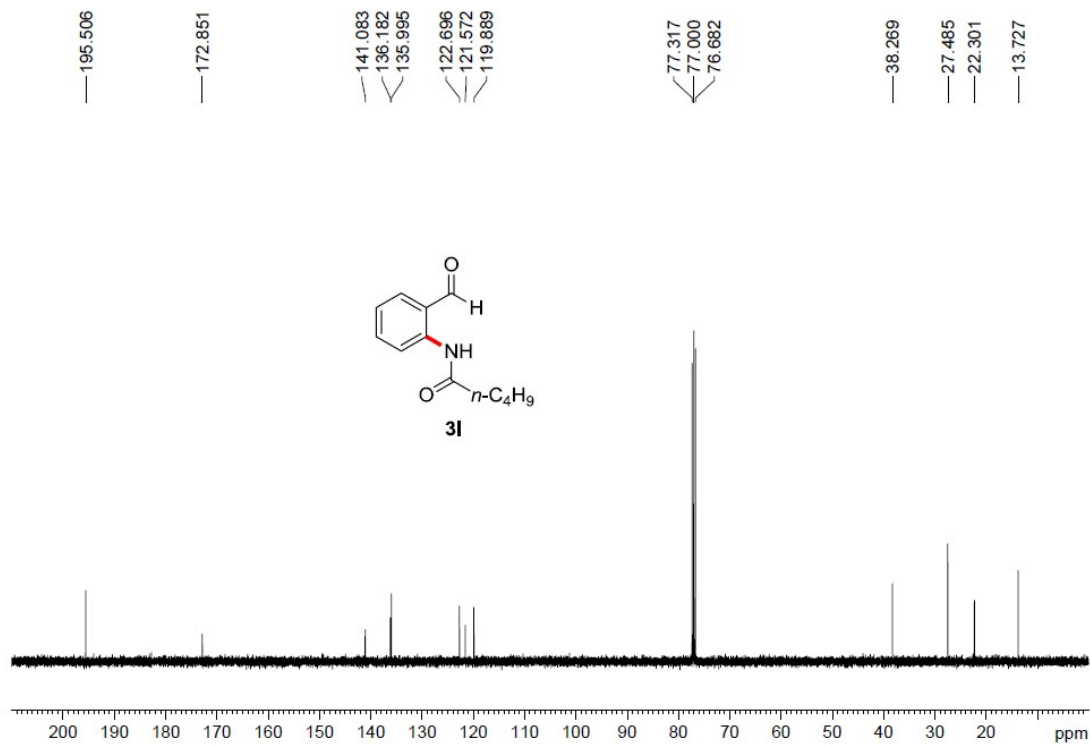



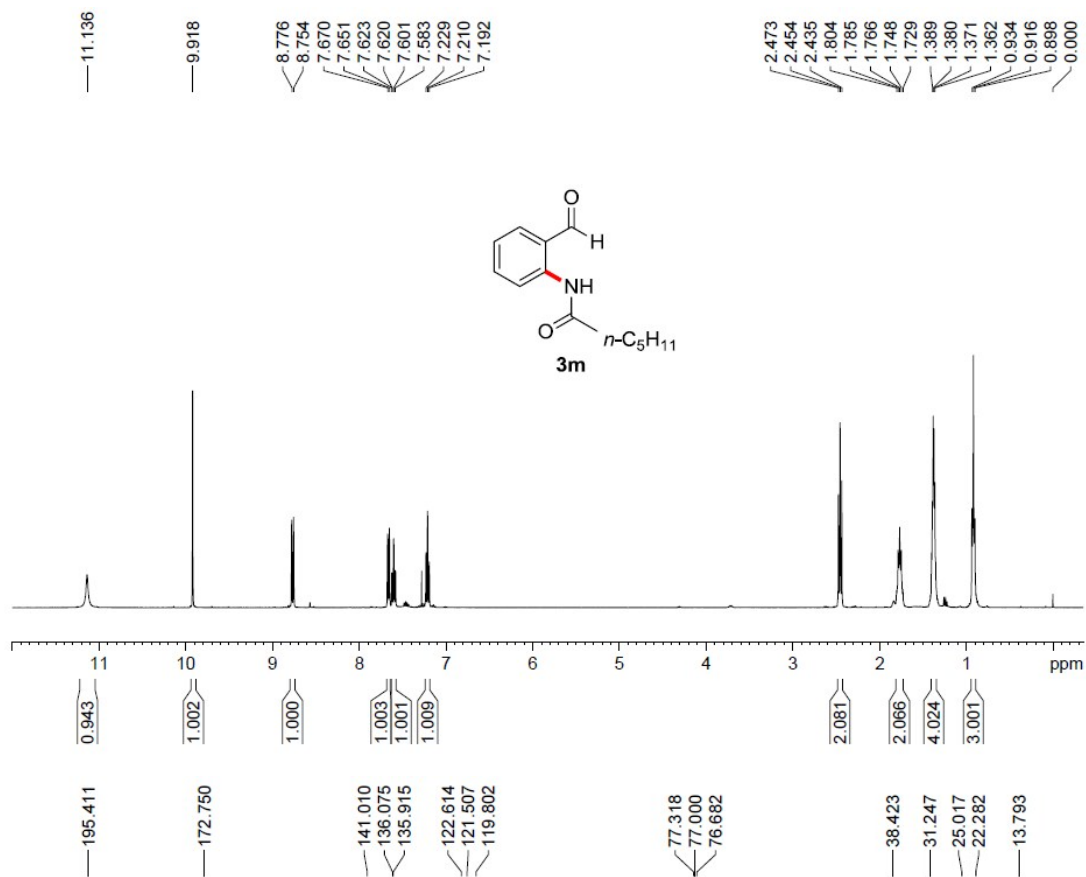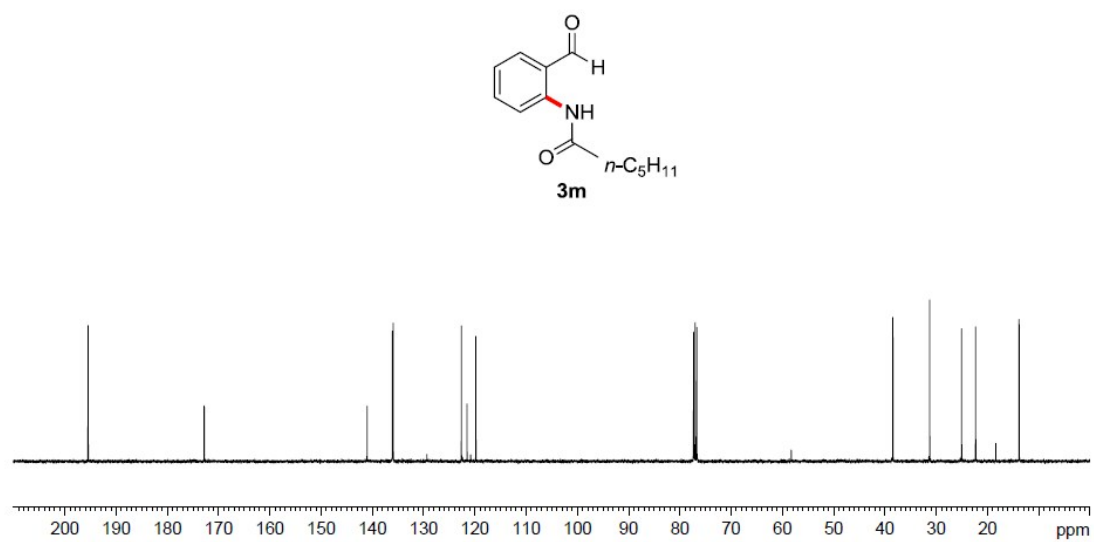

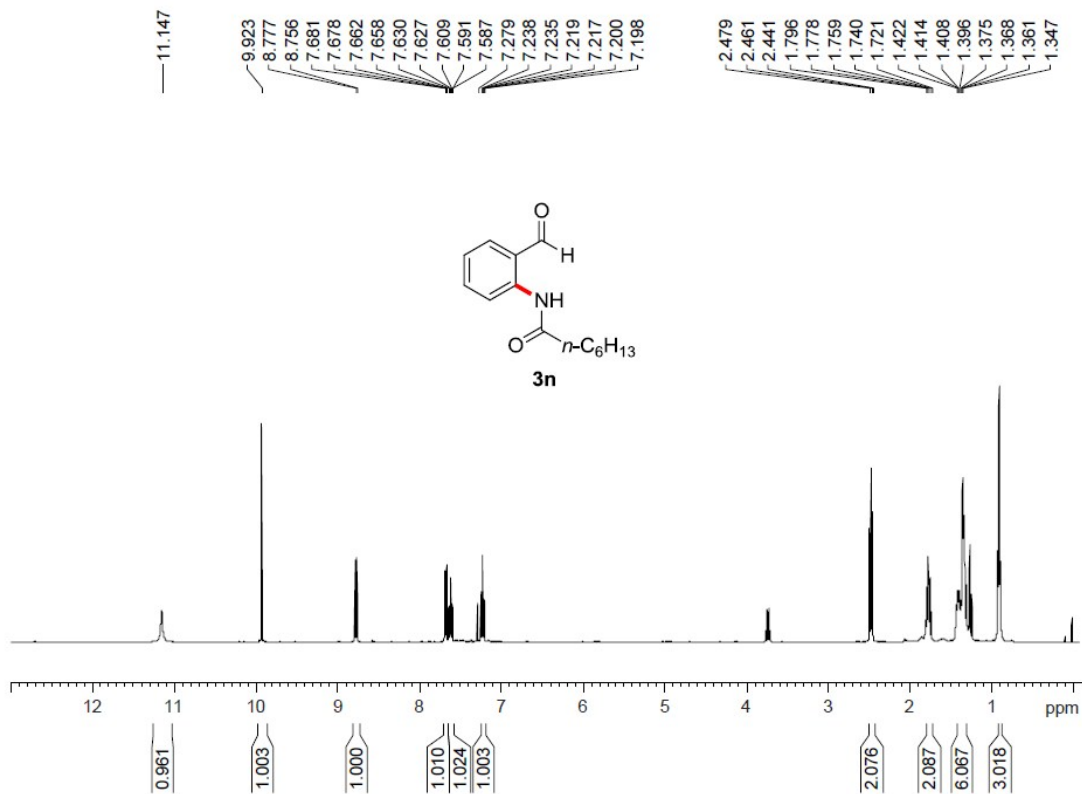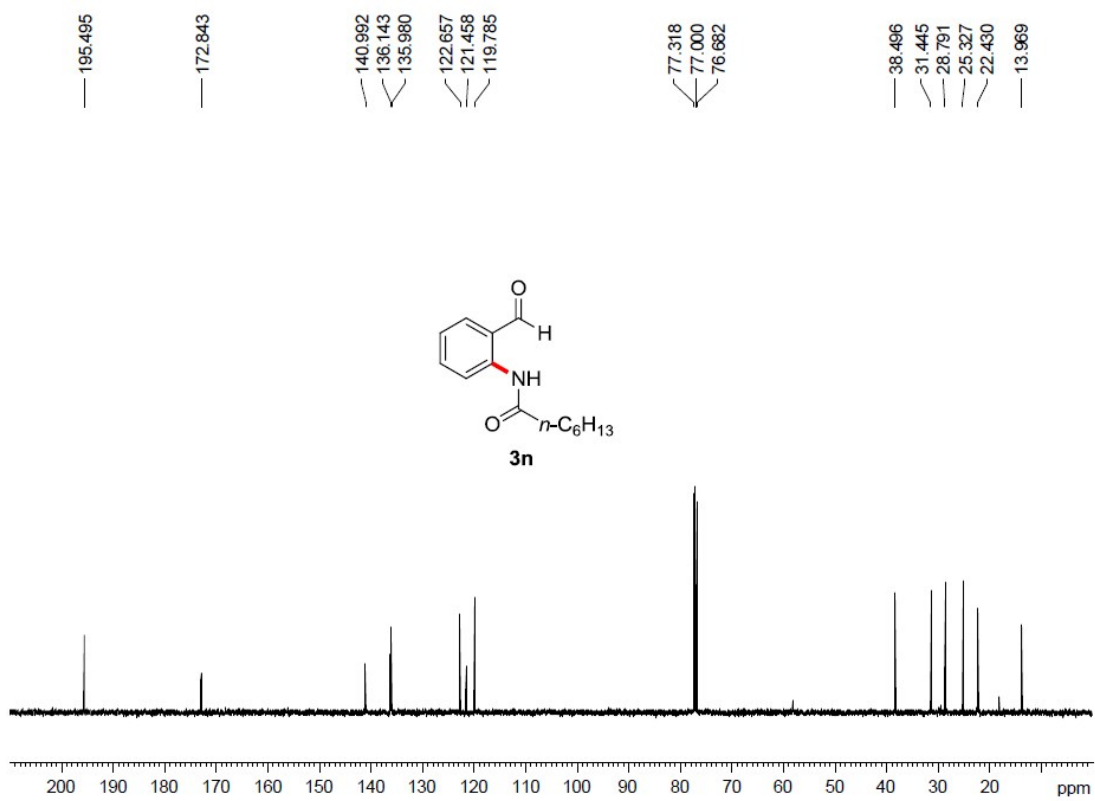

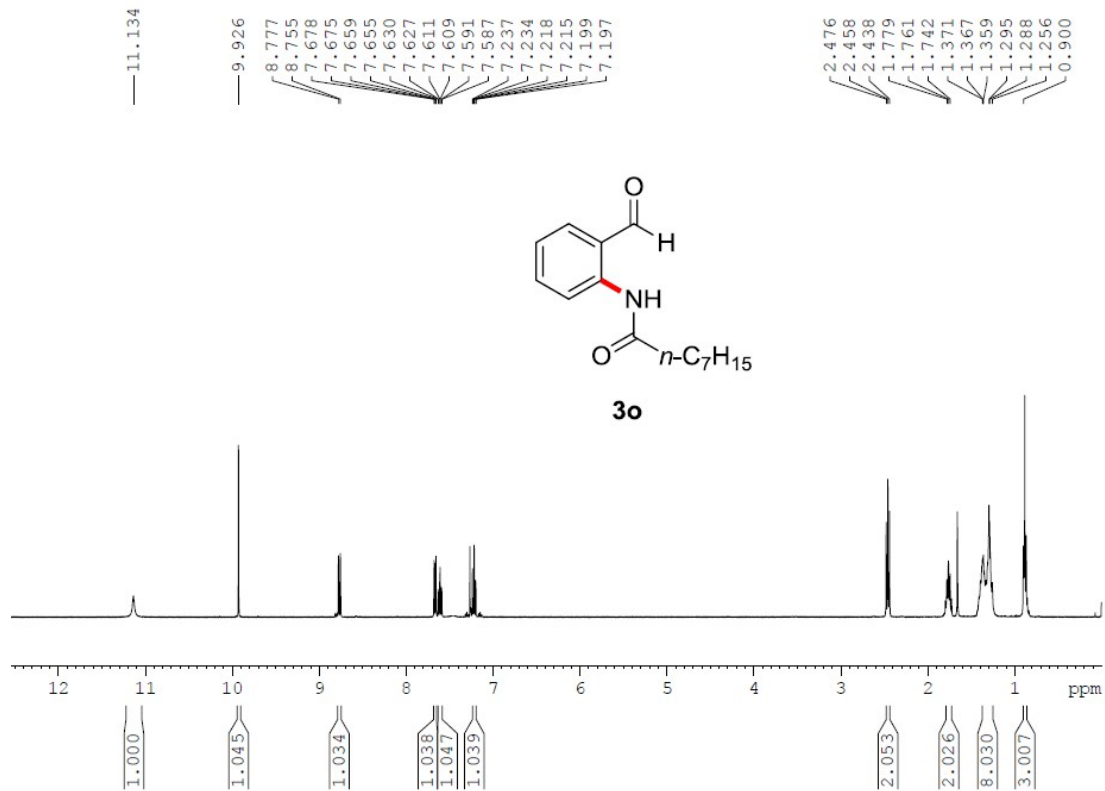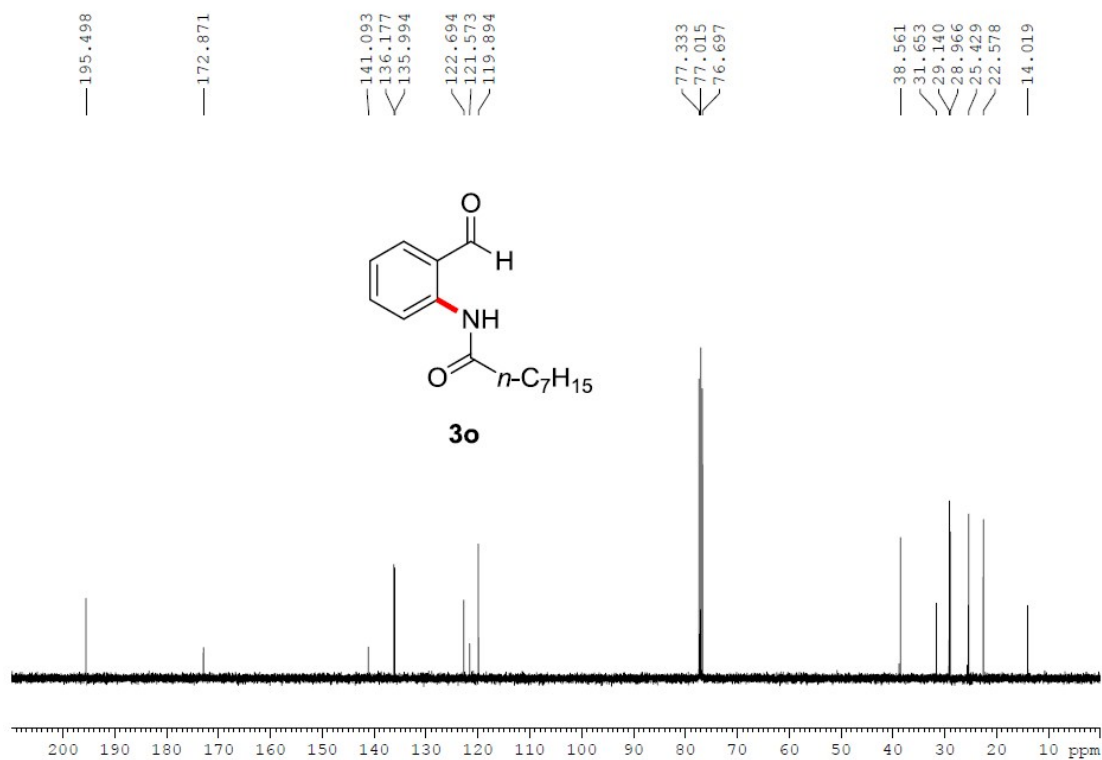

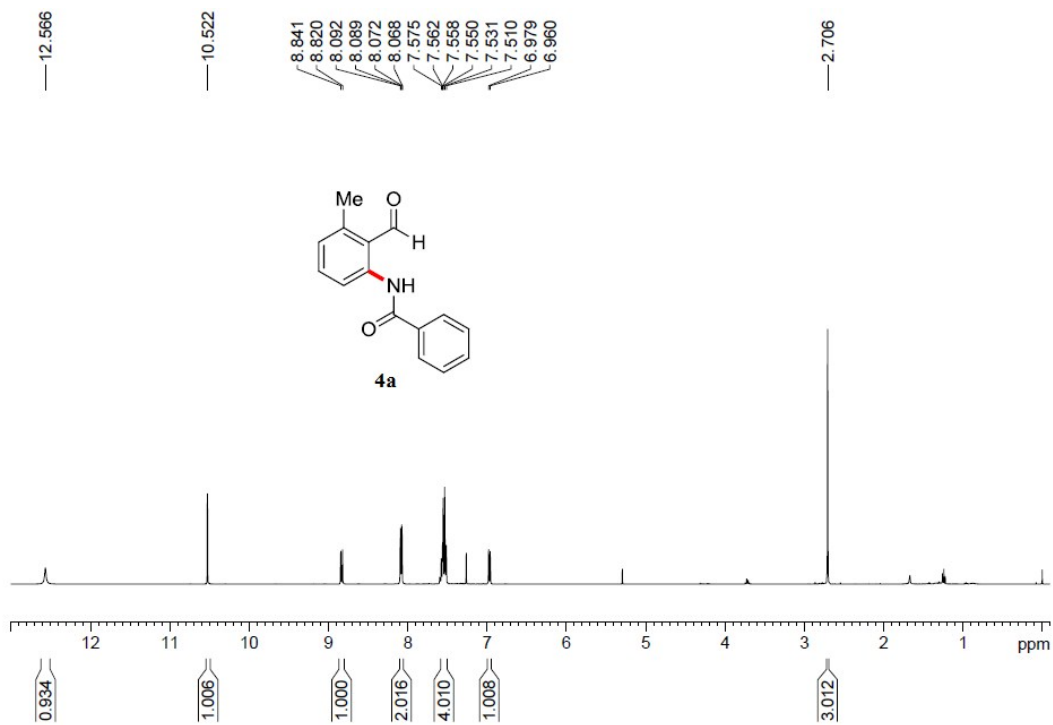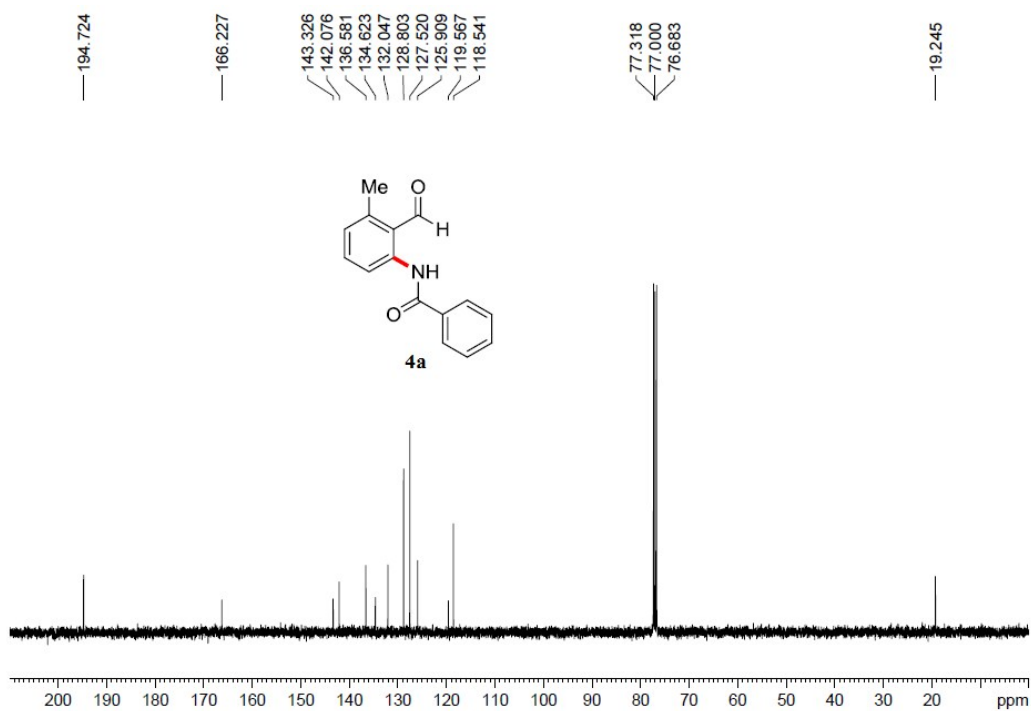

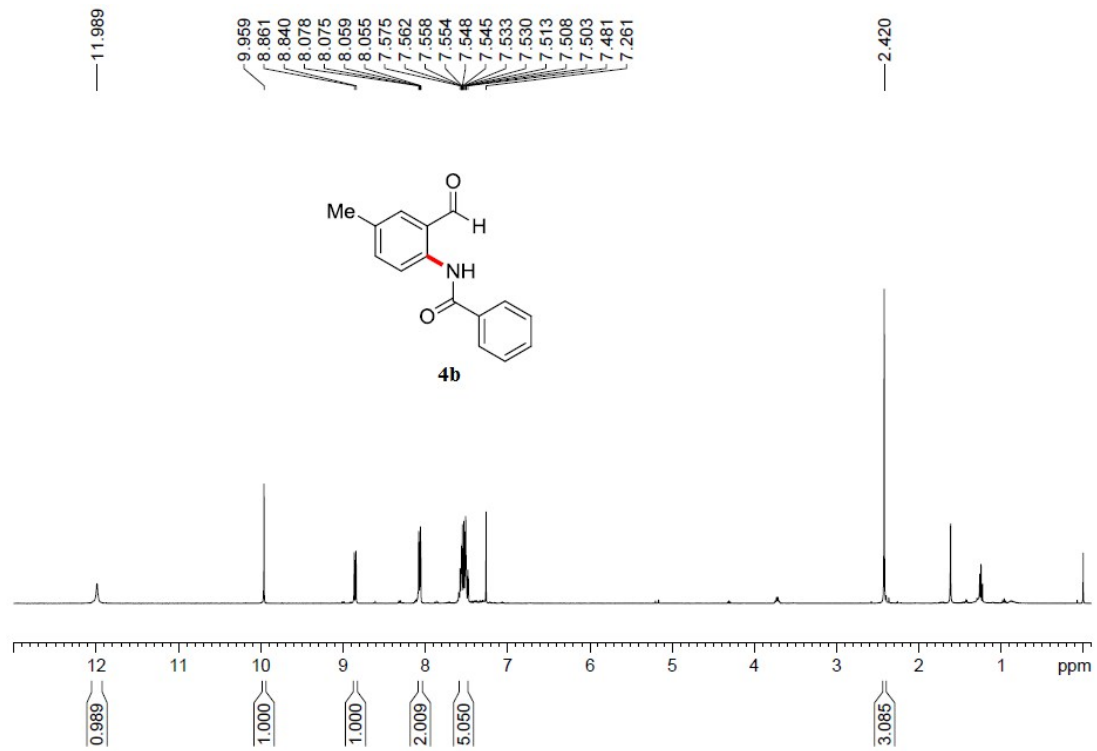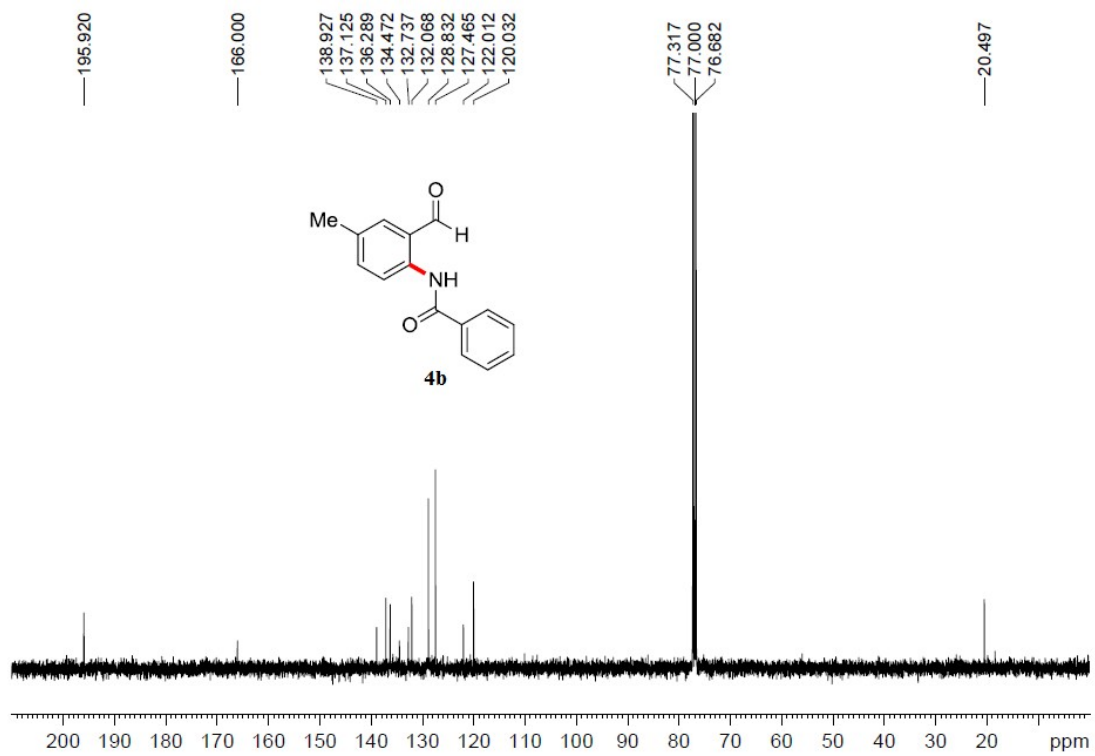

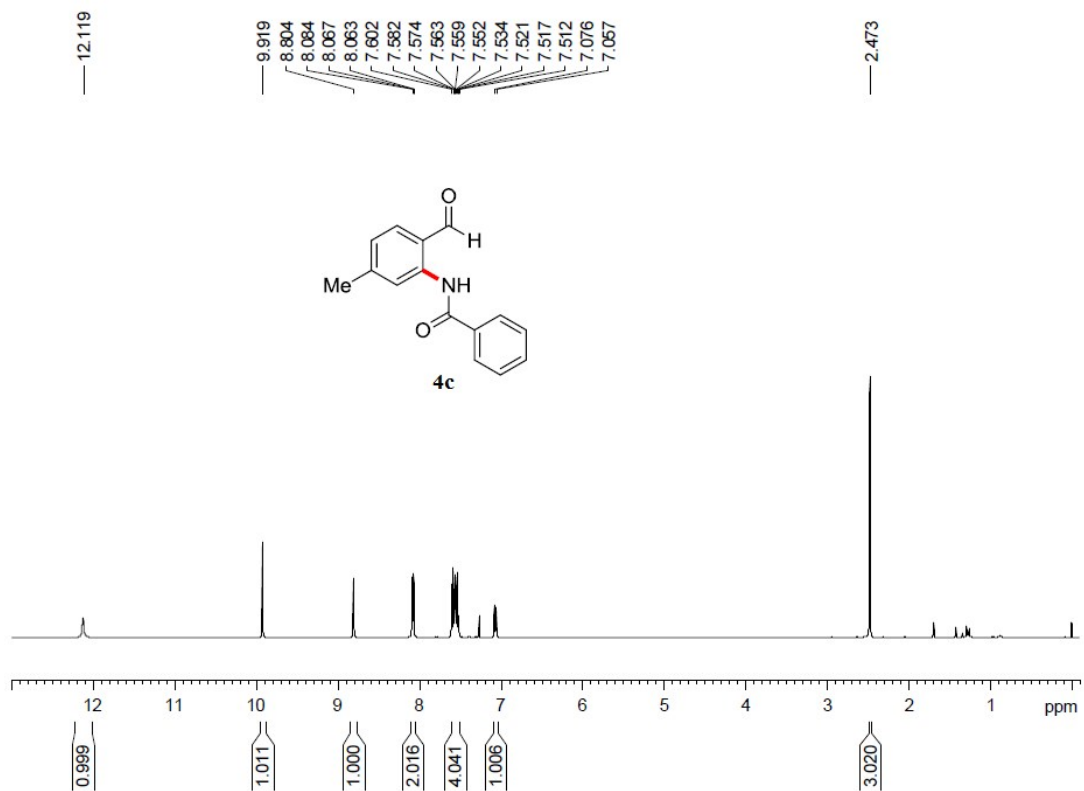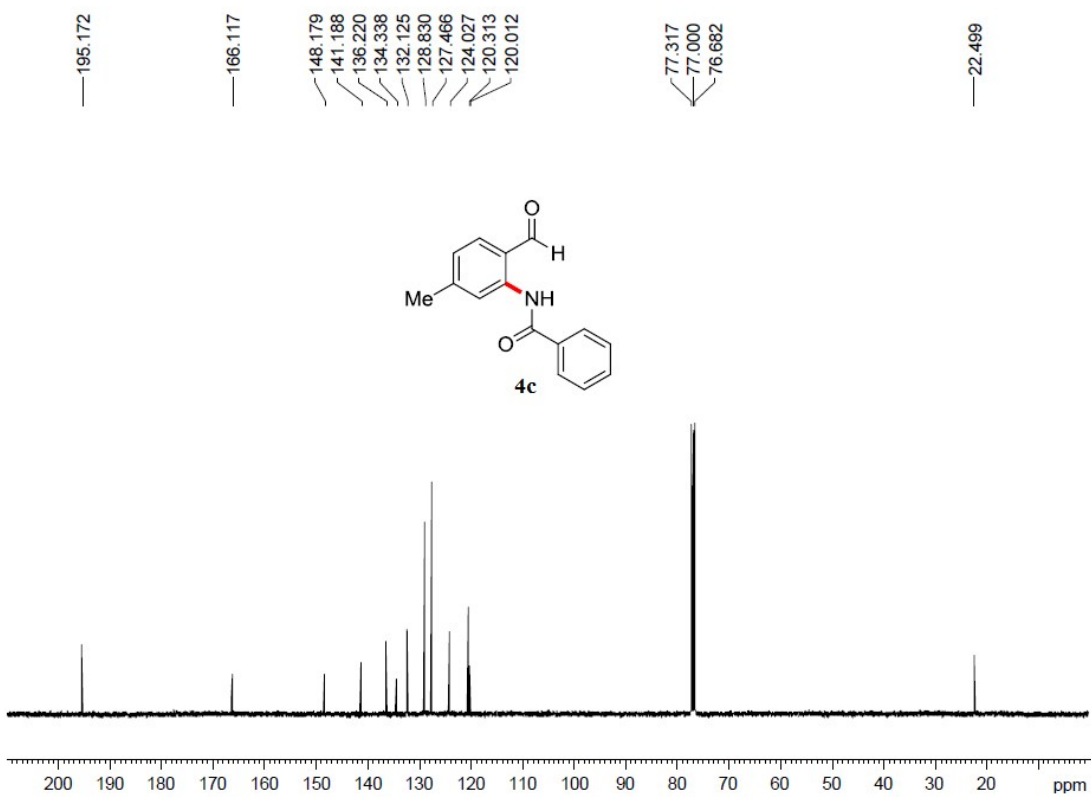

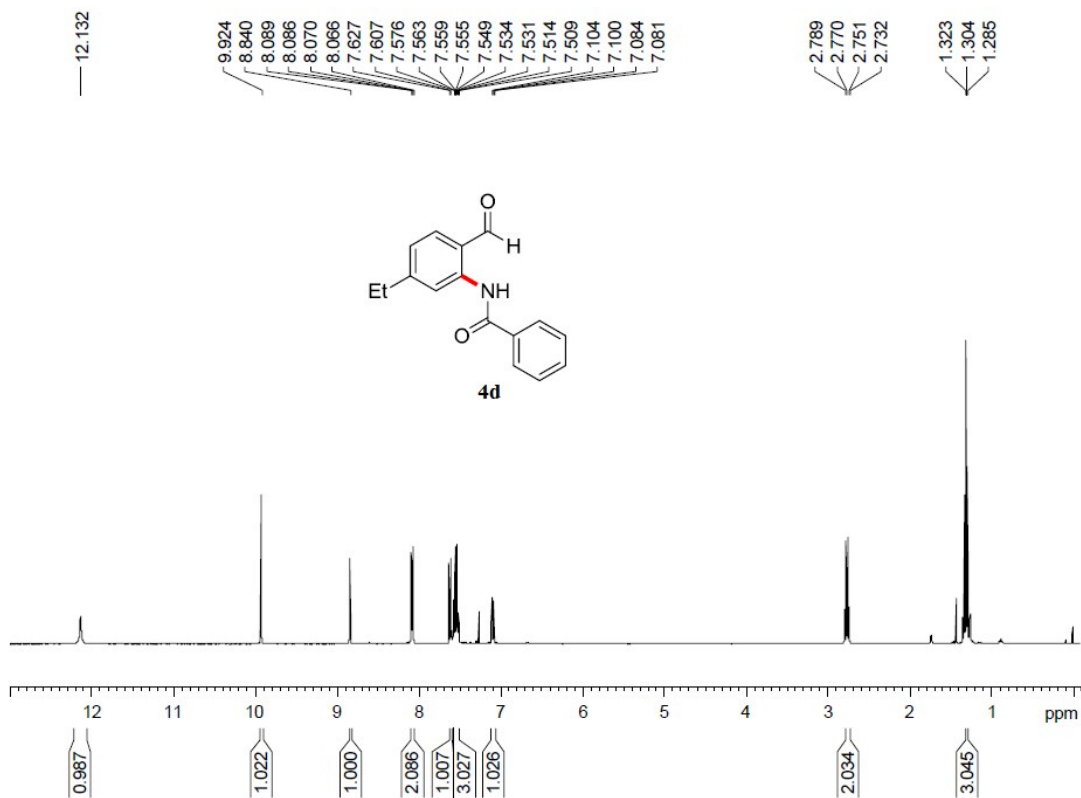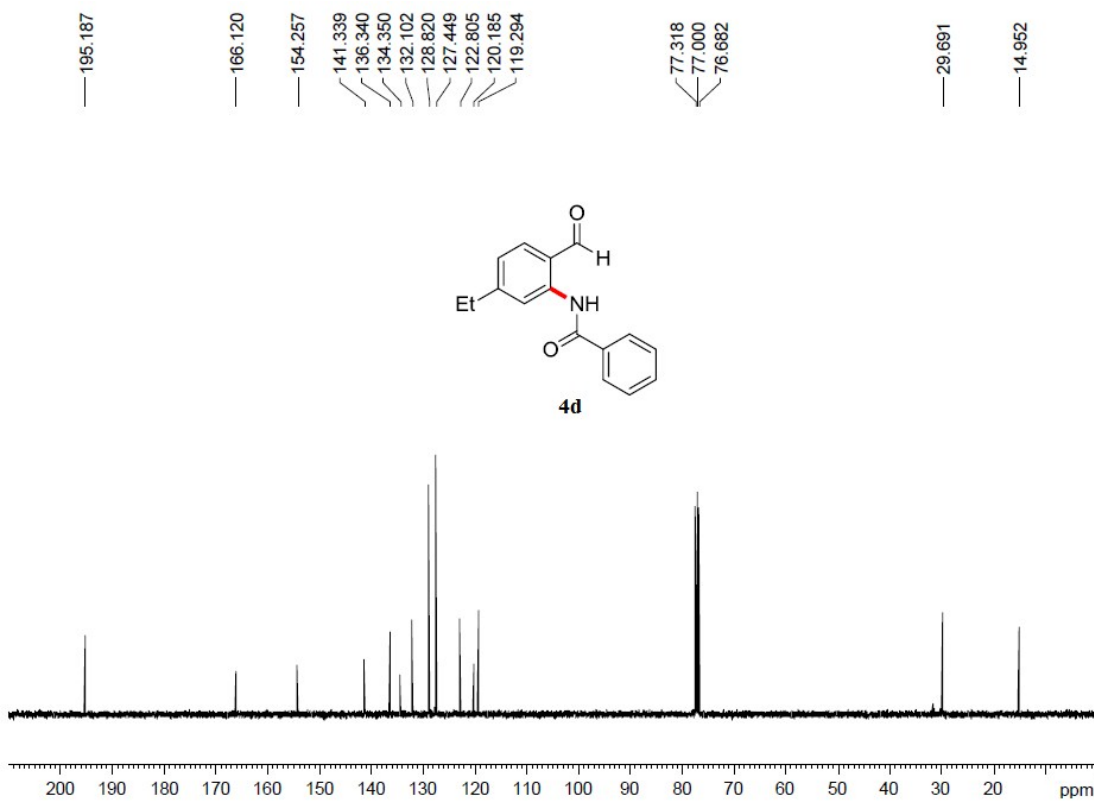

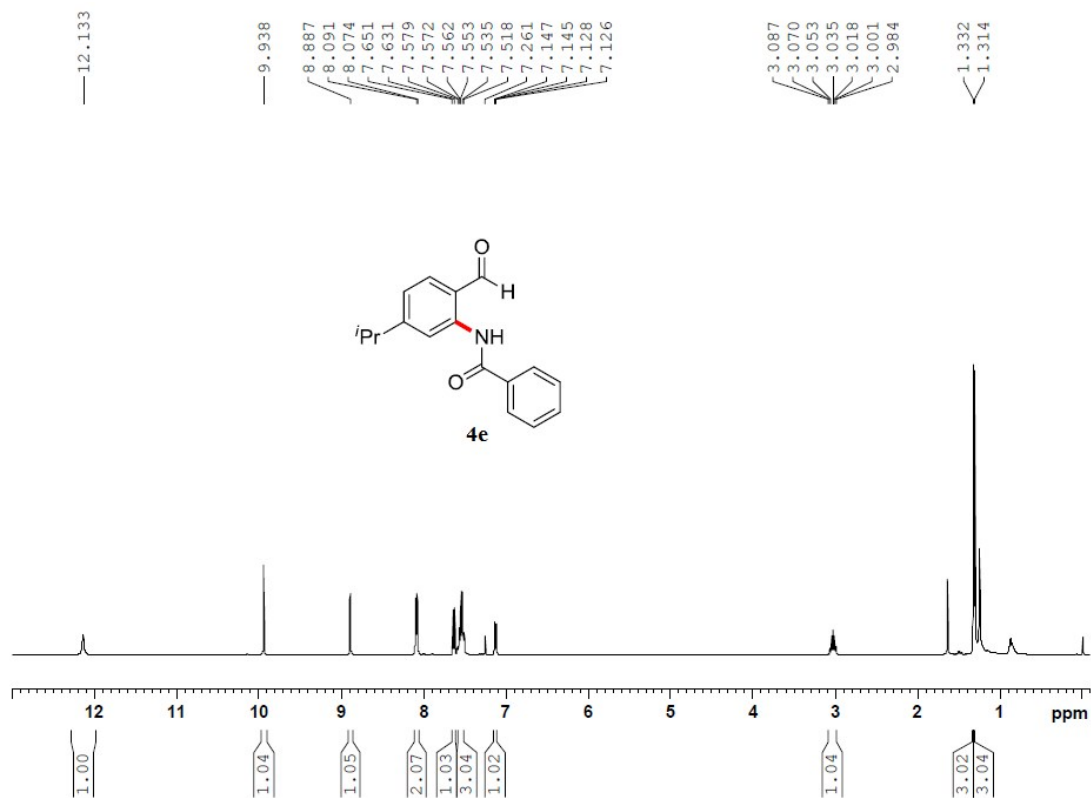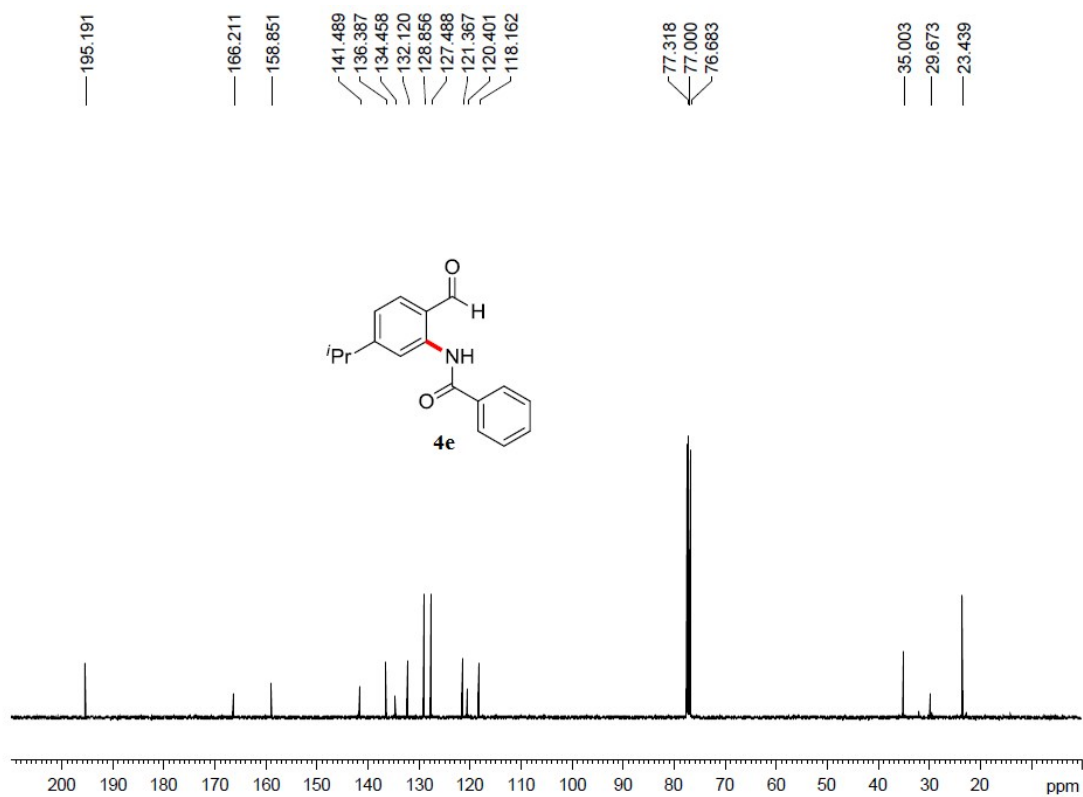



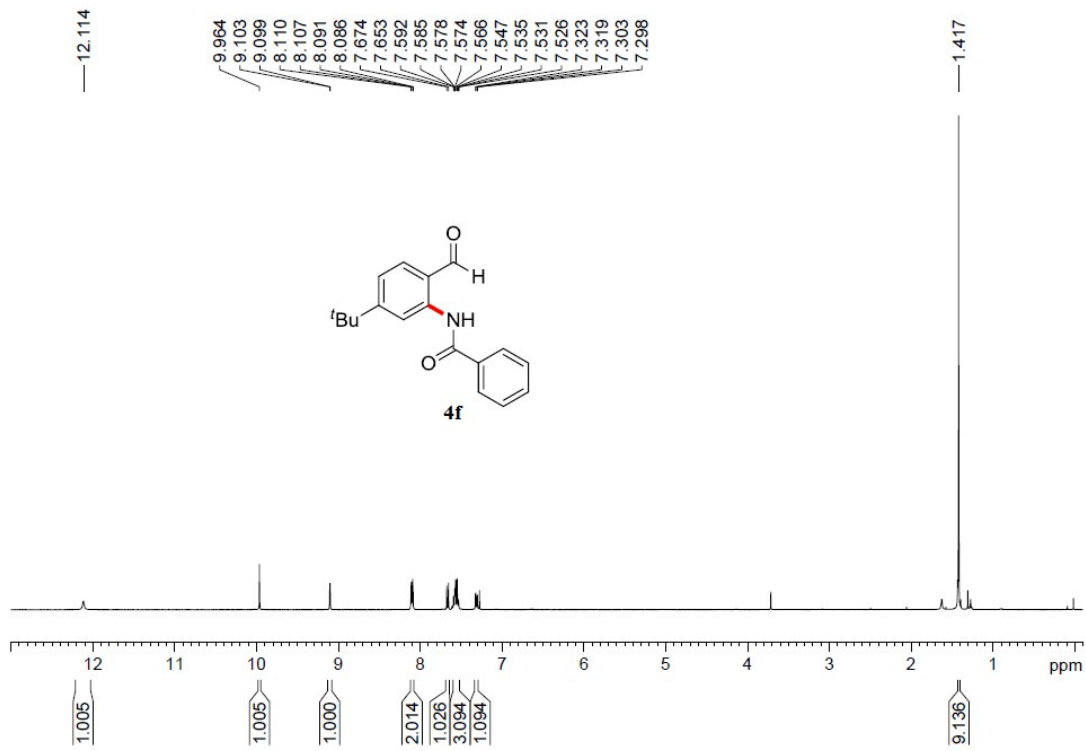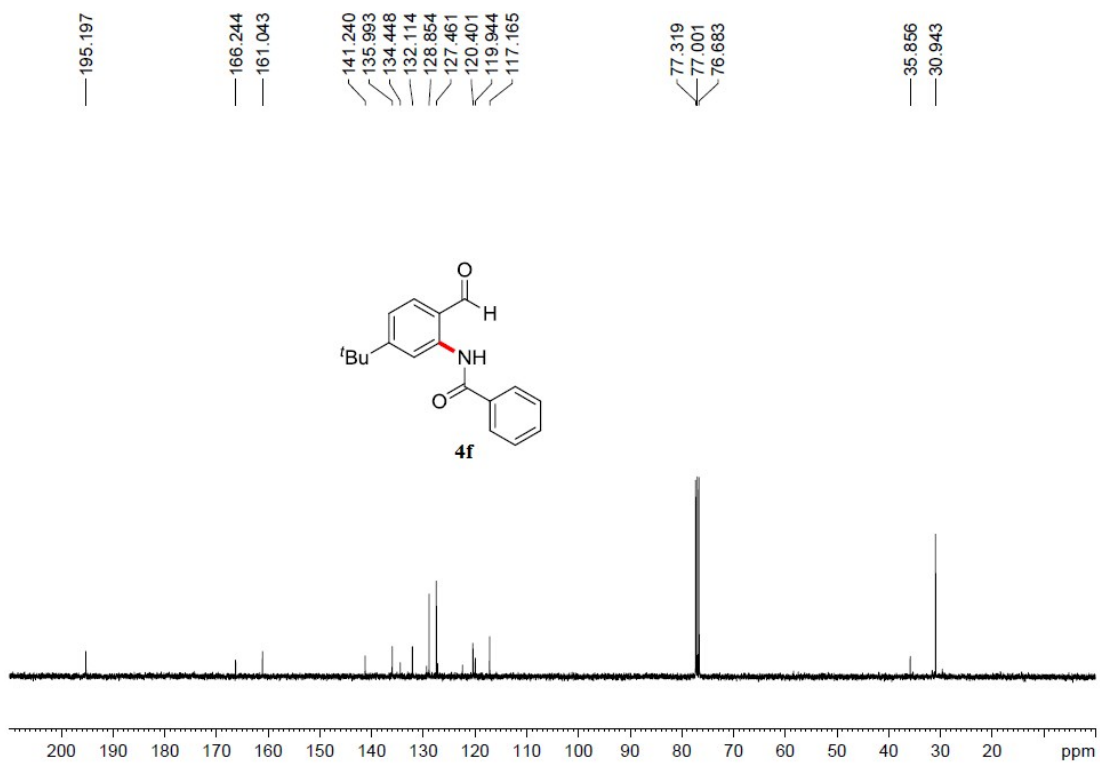

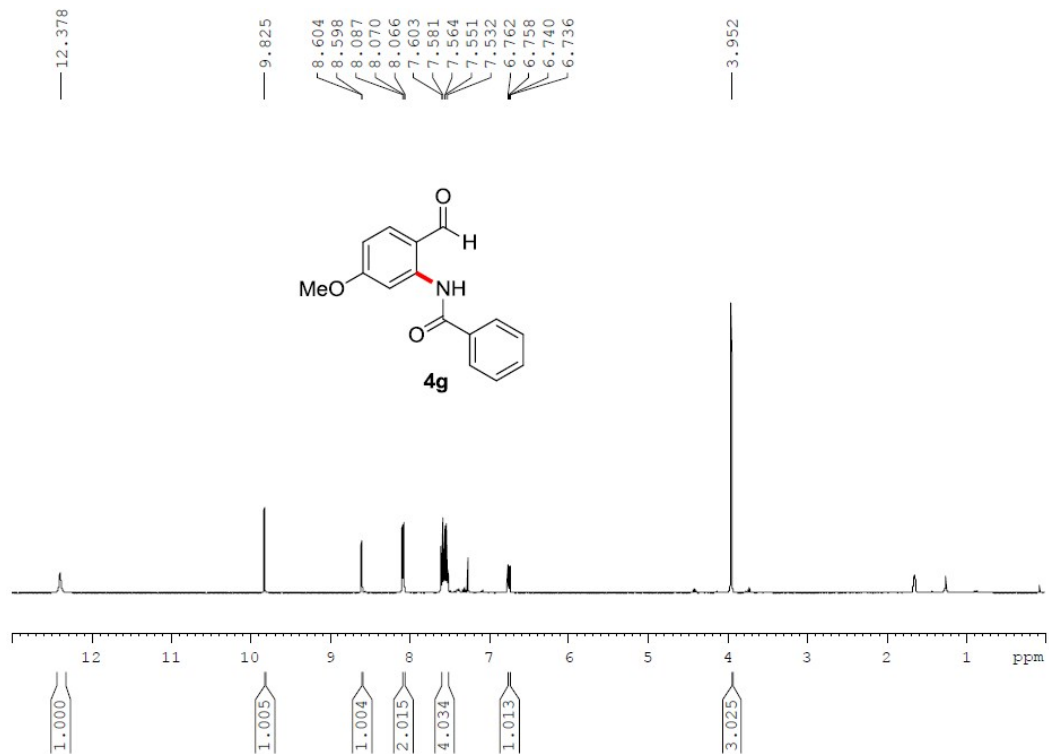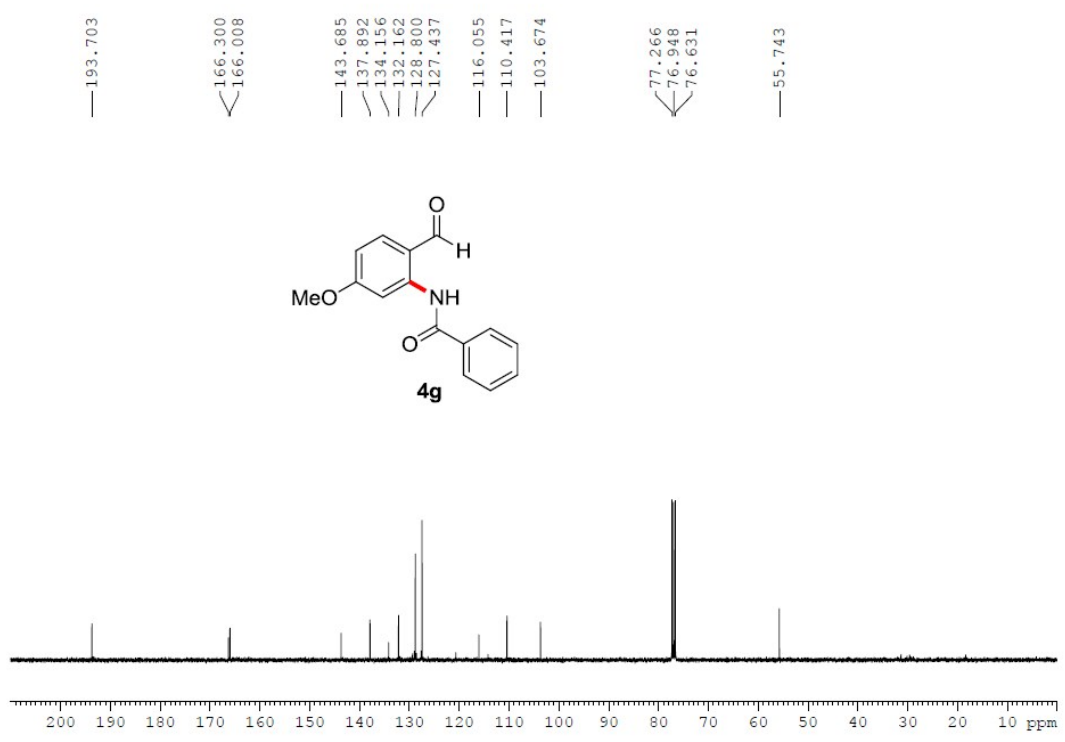

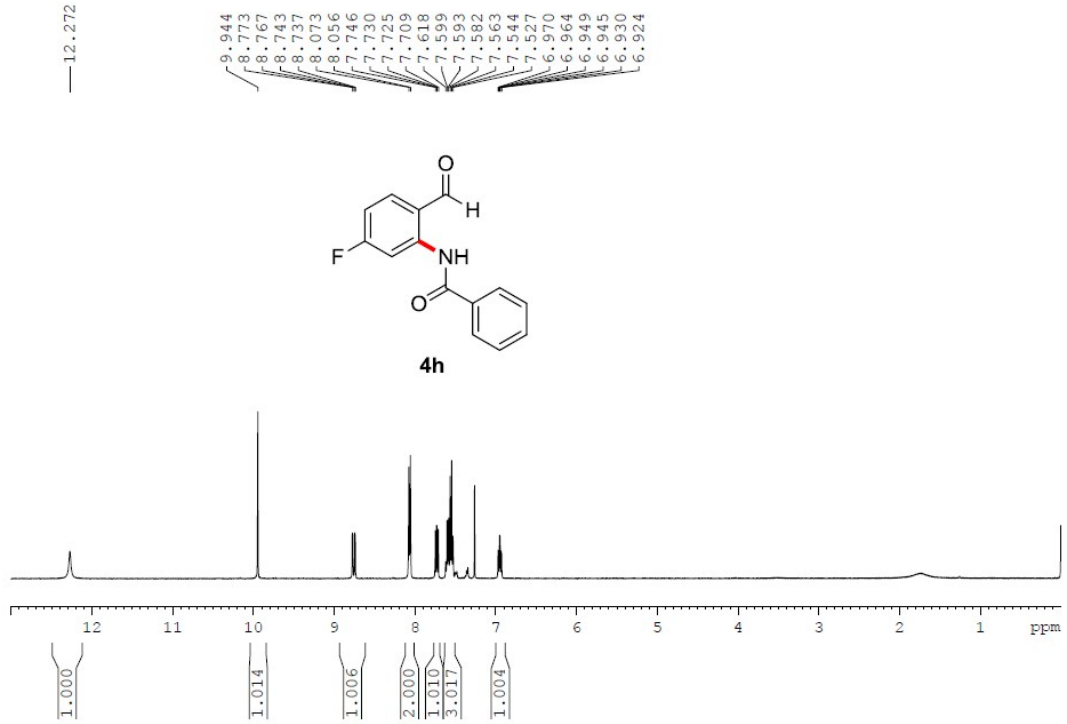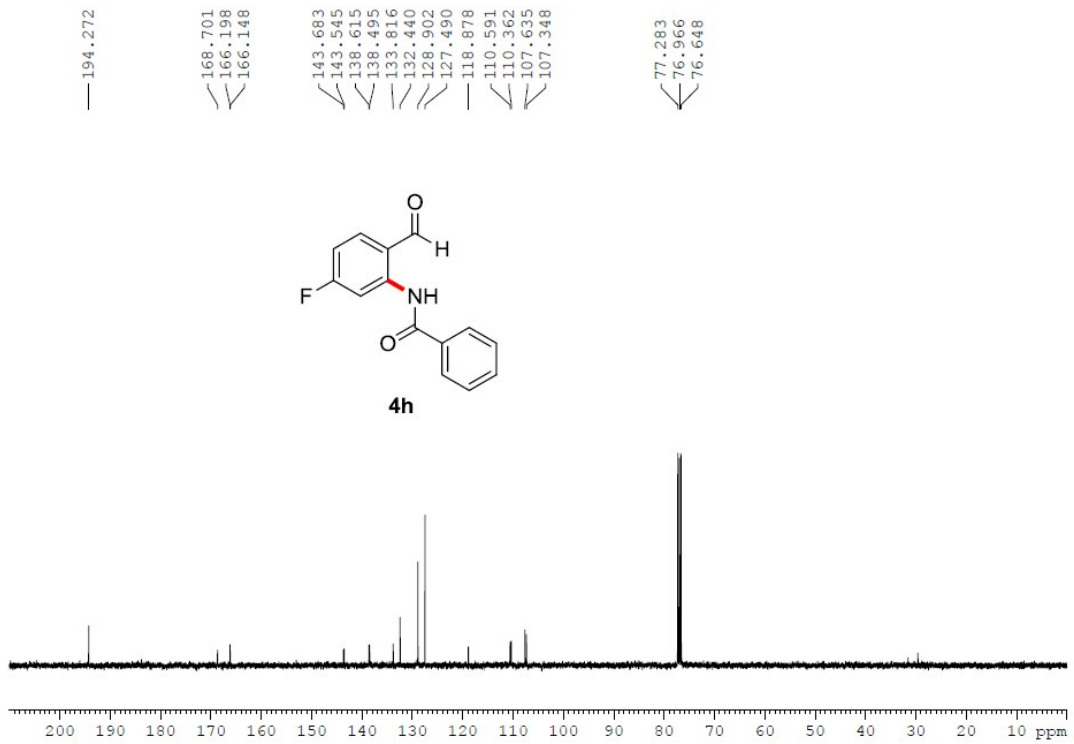

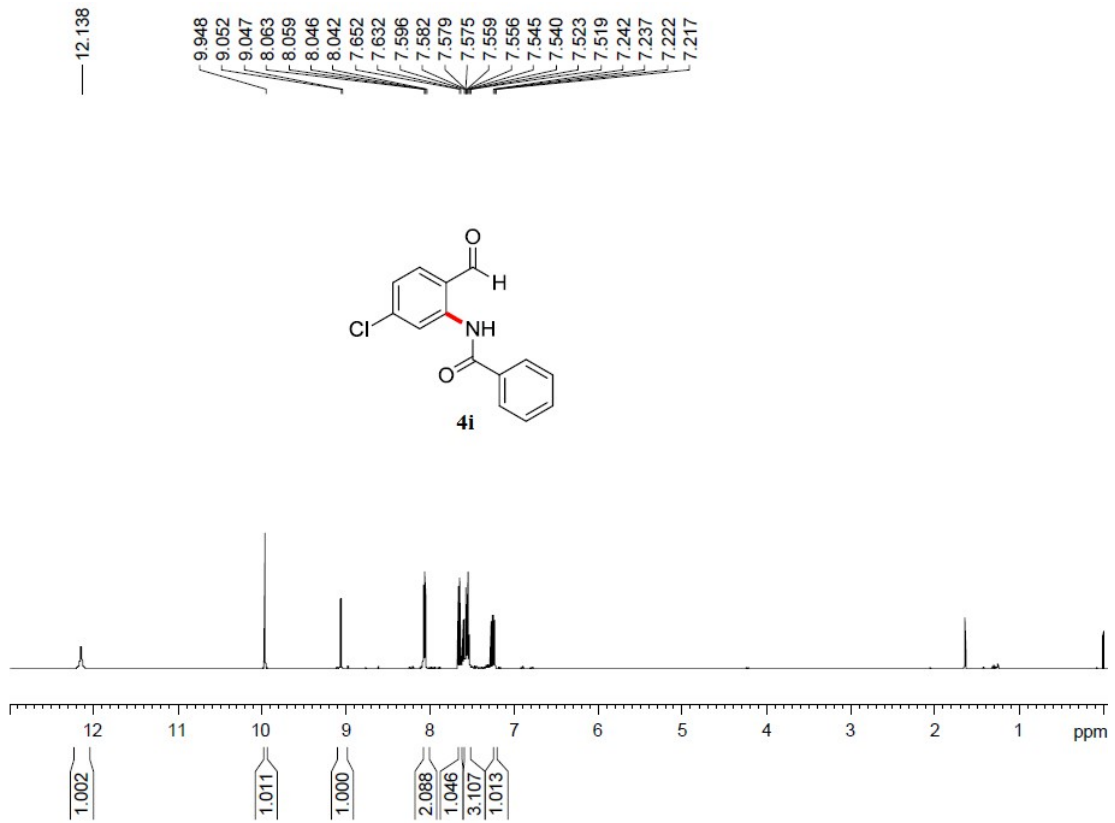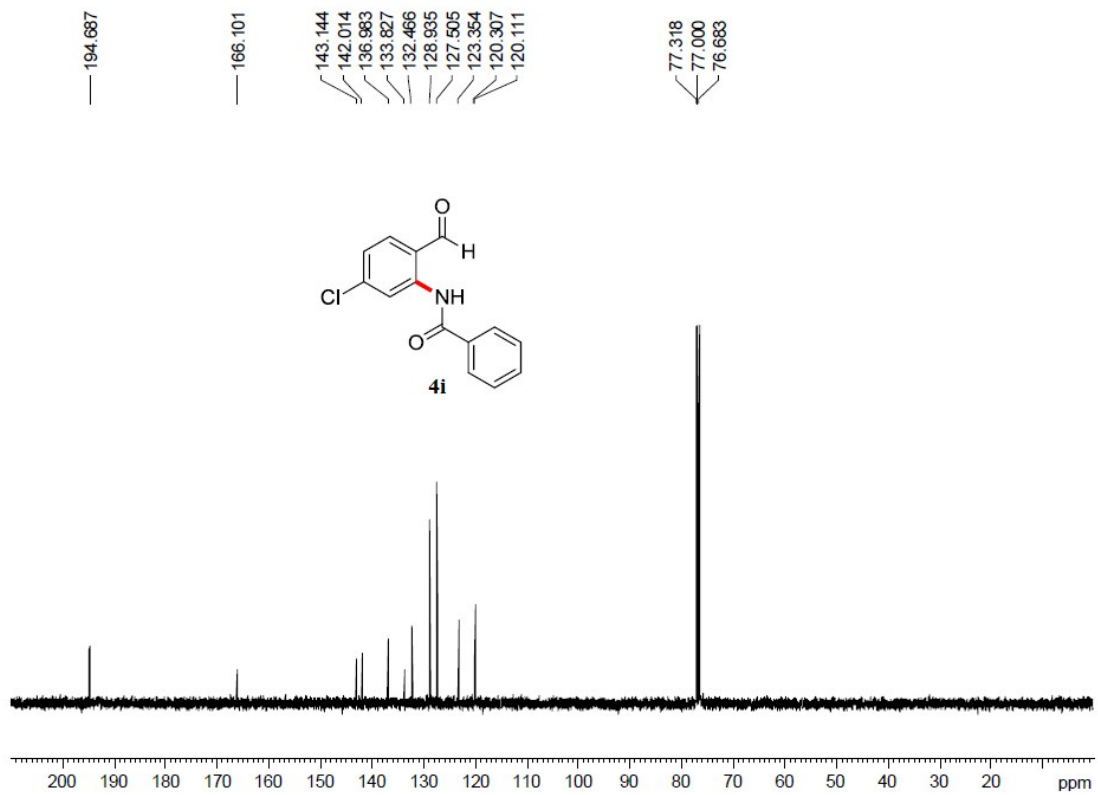

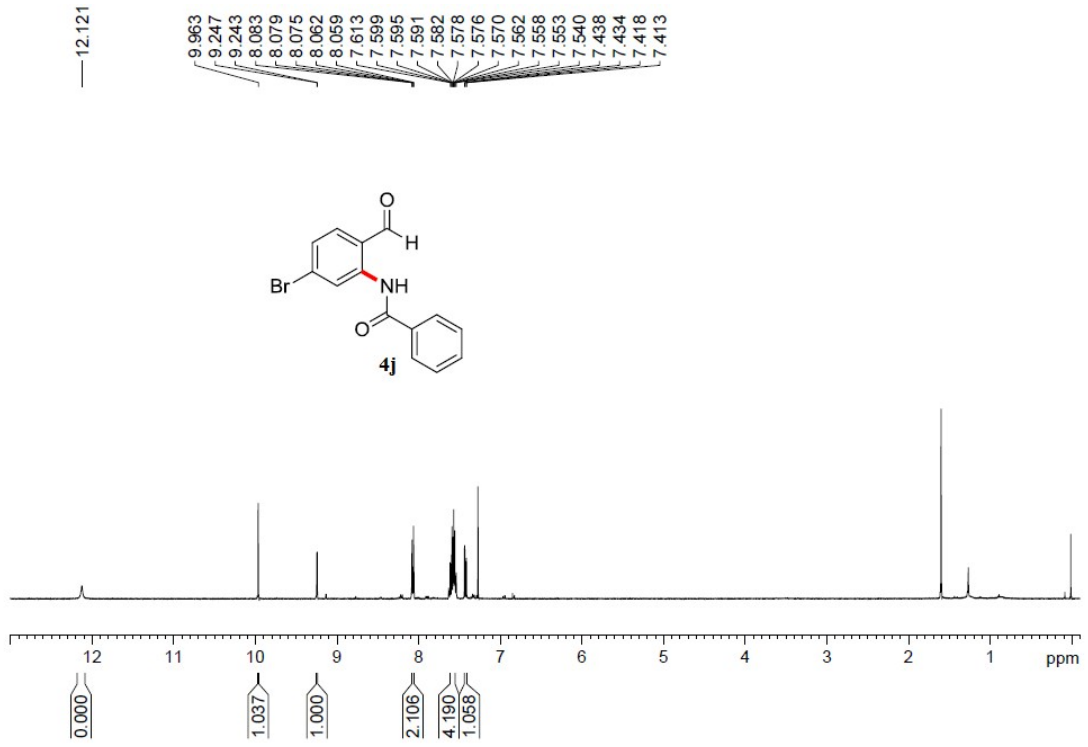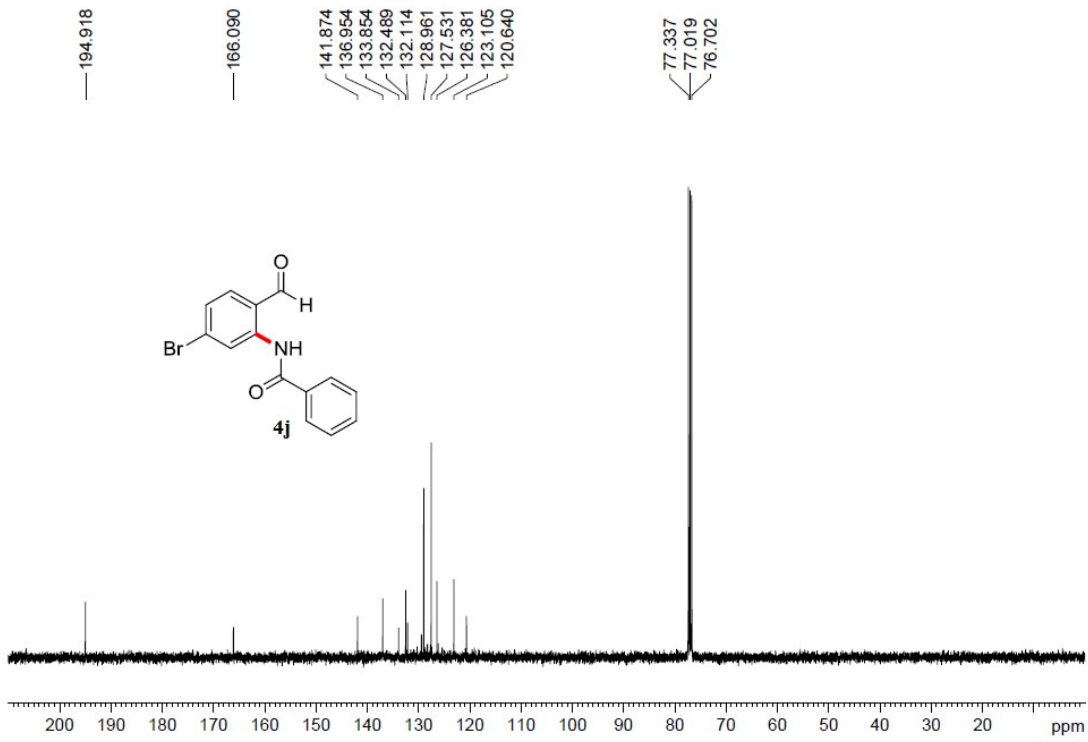

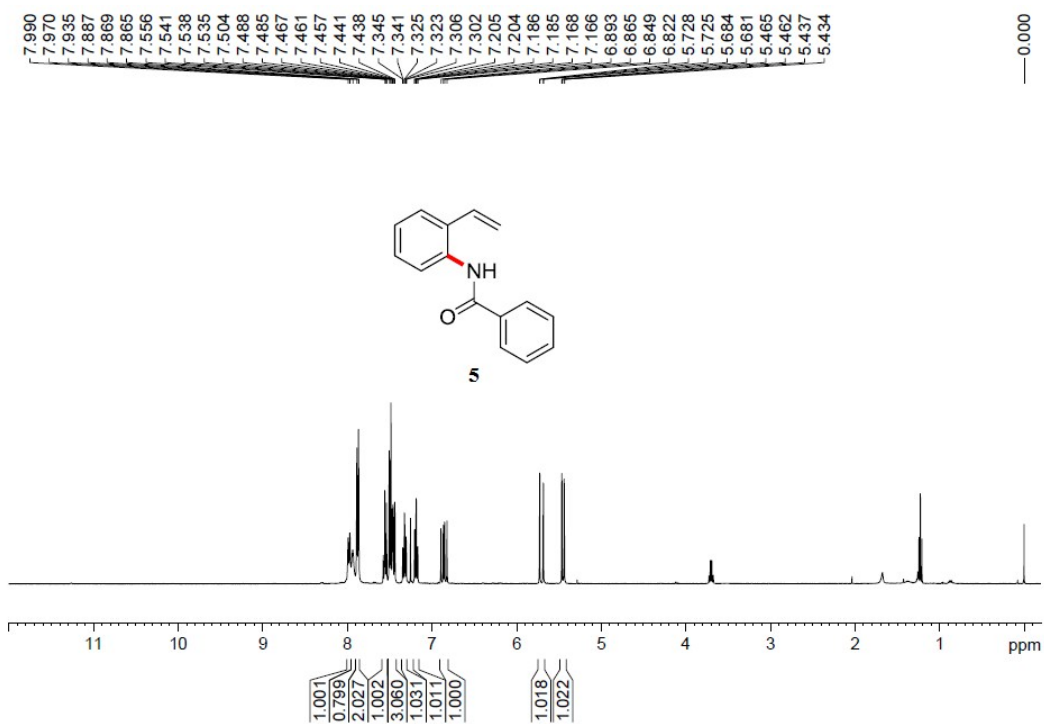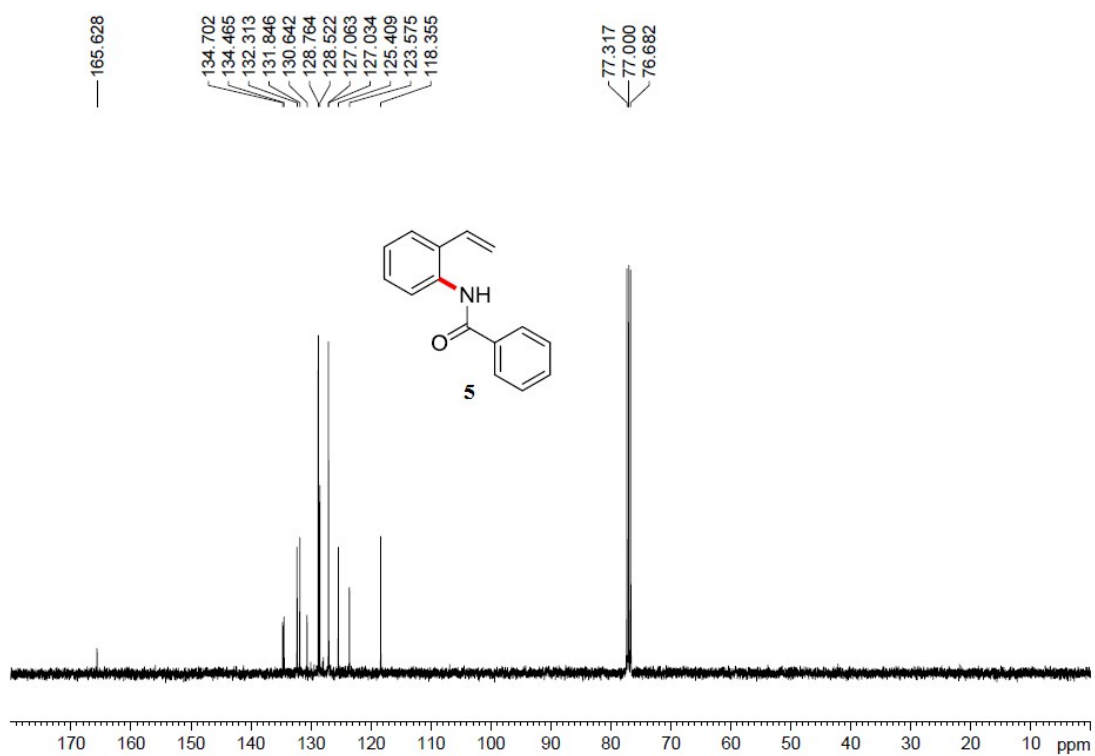

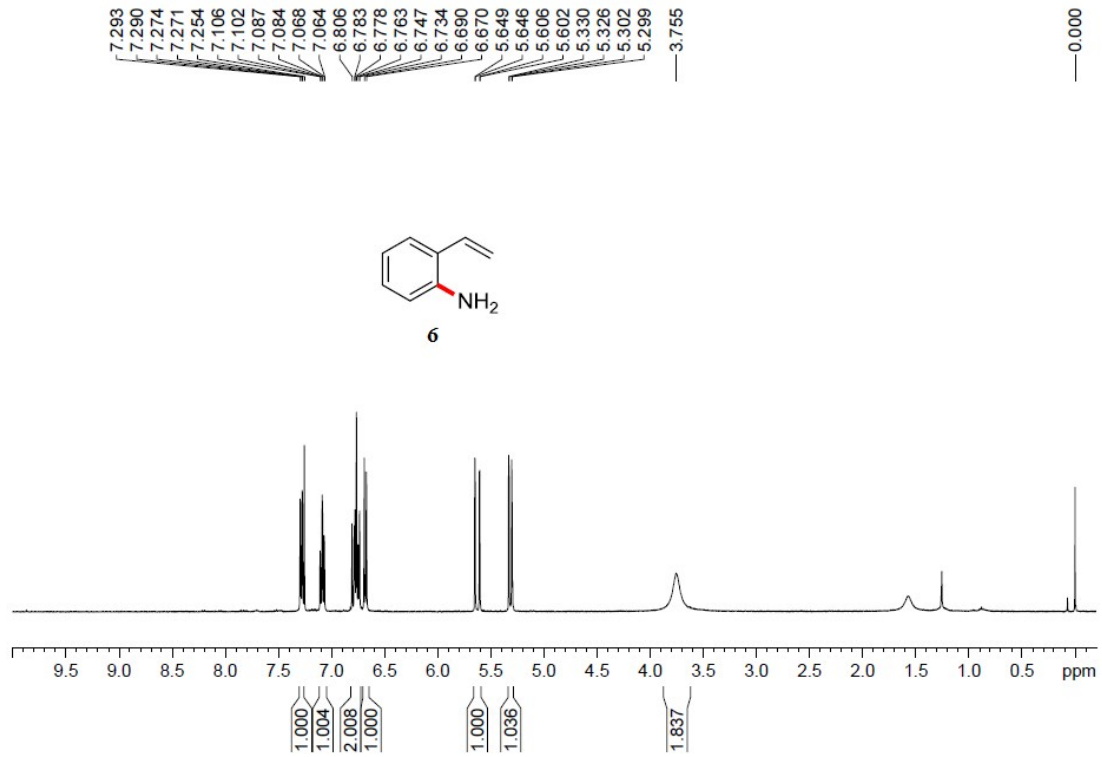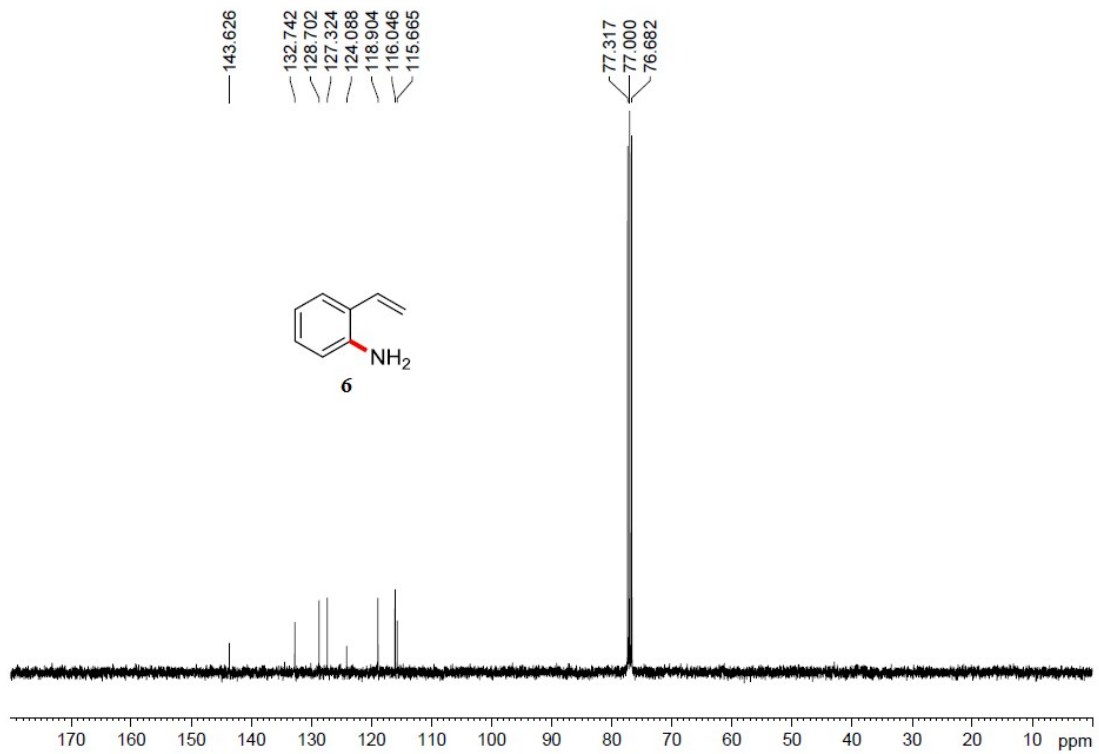

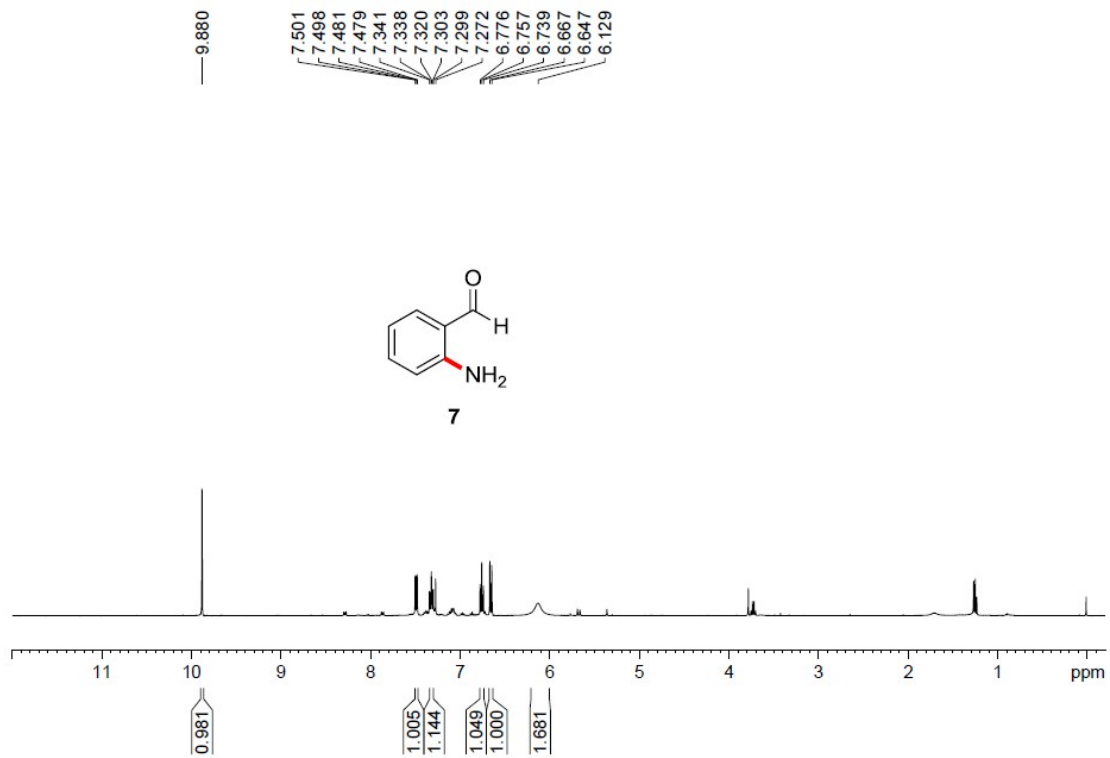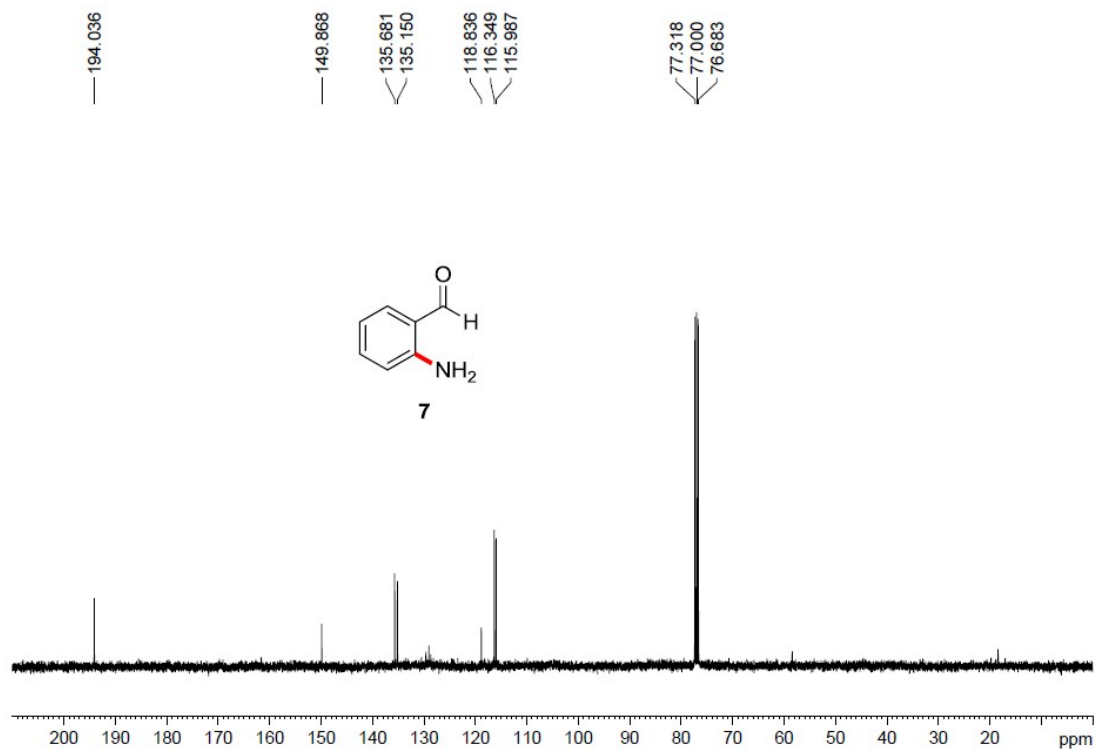



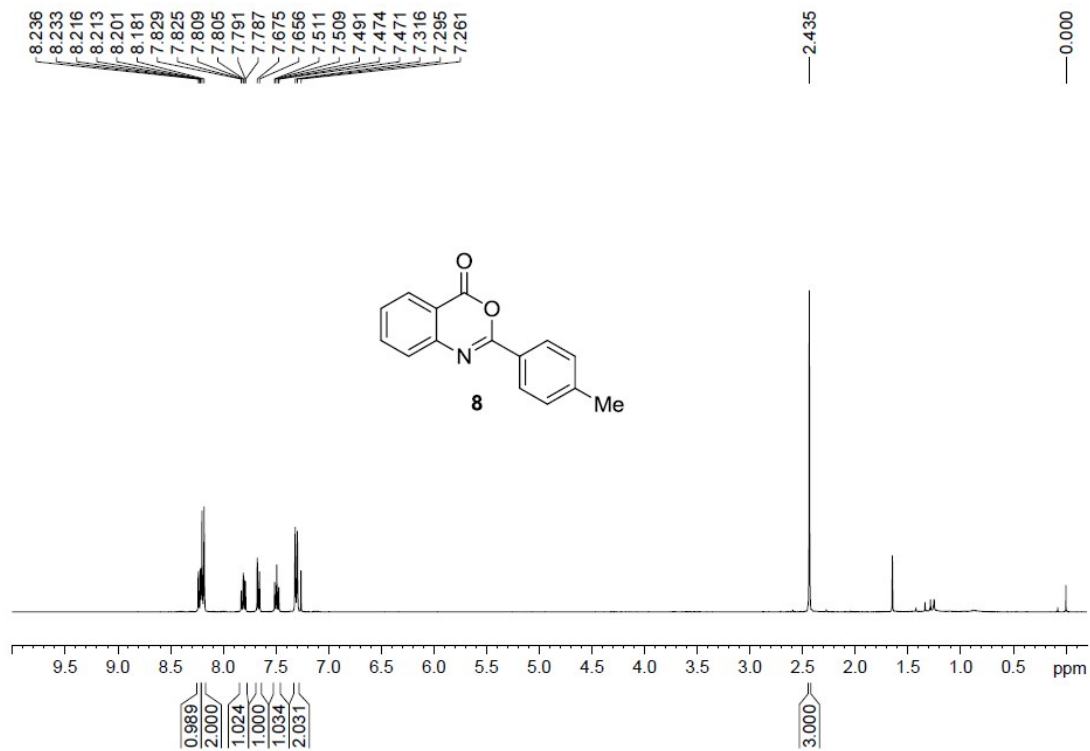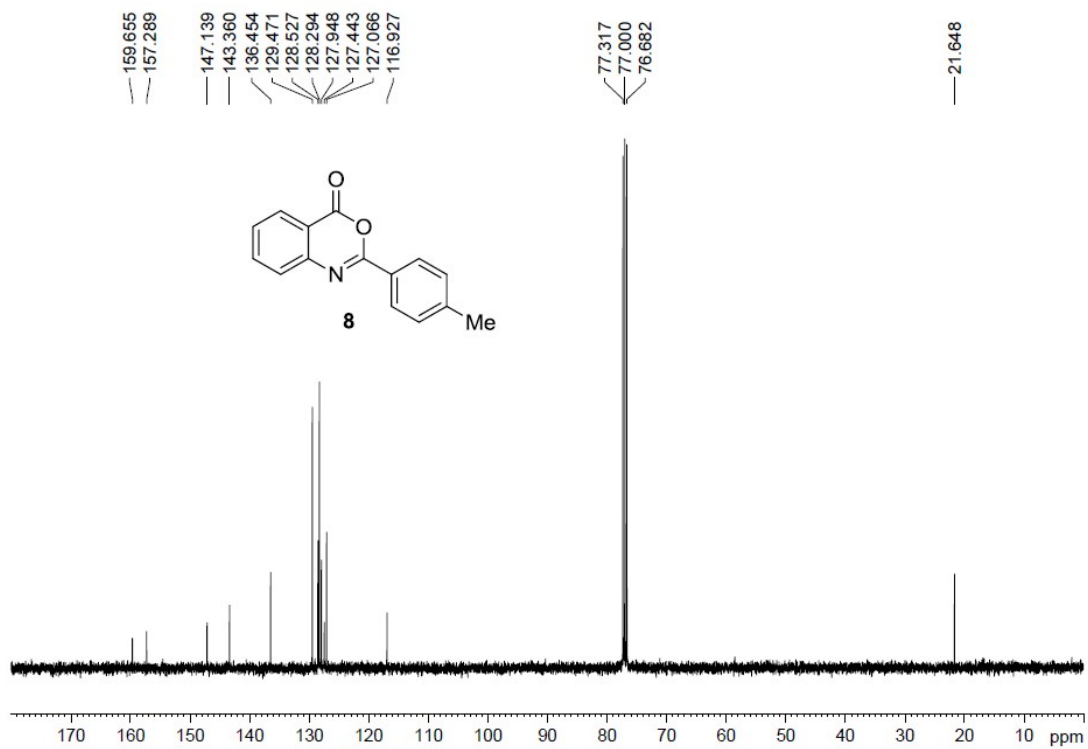

Supplement: c7cc05297a1.pdf [file c7cc05297a1.pdf]
